# Supplementary material for: DFT calculations of comparative energetics and ENDOR/Mössbauer properties for two protonation states of the iron dimer cluster of ribonucleotide reductase intermediate X
Source: Royal Society of Chemistry journal article supplement (doi:10.1039/b903847g), 2009-01-01
Supplement: b903847g.pdf [file b903847g.pdf]

# Supporting Information

## DFT Calculations of Comparative Energetics and Mössbauer Properties for Two Protonation States of the Iron Dimer Cluster of Ribonucleotide Reductase Intermediate X

Wen-Ge Han, and Louis Noodleman\*

Department of Molecular Biology  
TPC15  
The Scripps Research Institute  
10550 North Torrey Pines Road  
La Jolla, California 92037

\*To whom correspondence should be addressed.

E-mail: [lou@scripps.edu](mailto:lou@scripps.edu).

Fax: (858) 784-8896.

## $pK_a$ Calculations for $Fe^{2+}$ and $Fe^{3+}$ in Water

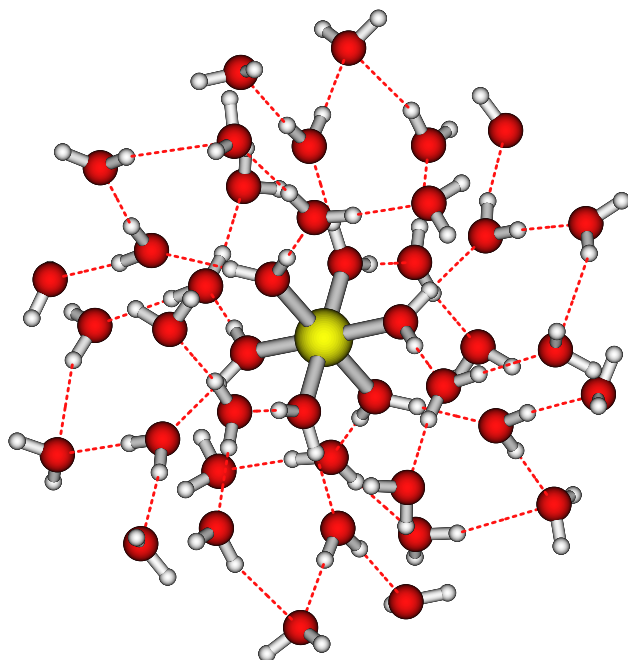

**Figure S1.** Structure of  $Fe^{2+}$  with 3 shells (6 + 12 + 24 = 42) of water molecules optimized with DFT/OPBE method using all-electron TZP Slater-type basis sets in COSMO solvation model with  $\epsilon = 80$ .

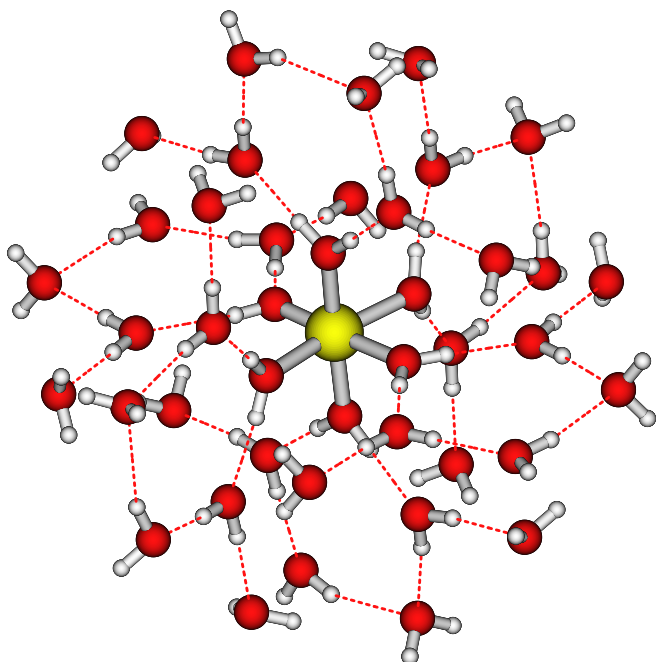

**Figure S2.** Structure of  $Fe^{2+} - OH^-$  with 3 shells (5 + 12 + 24 = 41) of water molecules.

**Table S1.** COSMO and DFT/PB-SCRF calculated energies ( $E$ , eV) for  $\text{Fe}(\text{H}_2\text{O})_{42}^{2+}$ ,  $\text{Fe}(\text{OH})(\text{H}_2\text{O})_{41}^+$ ,  $\text{Fe}(\text{H}_2\text{O})_{42}^{3+}$ , and  $\text{Fe}(\text{OH})(\text{H}_2\text{O})_{41}^{2+}$  systems, and the calculated (cal) and experimental (exp)  $\text{p}K_a$ 's for the processes of  $\text{Fe}(\text{H}_2\text{O})_{42}^{2+} \rightarrow \text{Fe}(\text{OH})(\text{H}_2\text{O})_{41}^+ + \text{H}^+$ , and  $\text{Fe}(\text{H}_2\text{O})_{42}^{3+} \rightarrow \text{Fe}(\text{OH})(\text{H}_2\text{O})_{41}^{2+} + \text{H}^+$ .

|                             | $\text{Fe}(\text{H}_2\text{O})_{42}^{2+}$ |                  | $\text{Fe}(\text{OH})(\text{H}_2\text{O})_{41}^+$ |          | $\text{Fe}(\text{H}_2\text{O})_{42}^{3+}$ |                  | $\text{Fe}(\text{OH})(\text{H}_2\text{O})_{41}^{2+}$ |          |
|-----------------------------|-------------------------------------------|------------------|---------------------------------------------------|----------|-------------------------------------------|------------------|------------------------------------------------------|----------|
|                             | COSMO                                     | SCRF             | COSMO                                             | SCRF     | COSMO                                     | SCRF             | COSMO                                                | SCRF     |
| $E$                         | -619.263                                  | -618.664         | -619.229                                          | -618.653 | -614.254                                  | -613.768         | -614.780                                             | -614.295 |
| $\text{p}K_a(\text{cal})^a$ | 10.91                                     | 10.52            |                                                   |          | 1.04                                      | 1.02             |                                                      |          |
| $\text{p}K_a(\text{exp})$   | 9.5 <sup>b</sup>                          | 9.5 <sup>b</sup> |                                                   |          | 2.2 <sup>c</sup>                          | 2.2 <sup>c</sup> |                                                      |          |

<sup>a</sup> See section 3.5. The  $\Delta\text{ZPE}$  terms are  $-7.1 \text{ kcal mol}^{-1}$  for  $\text{Fe}(\text{H}_2\text{O})_{42}^{2+} \rightarrow \text{Fe}(\text{OH})(\text{H}_2\text{O})_{41}^+ + \text{H}^+$ , and  $-7.7 \text{ kcal mol}^{-1}$  for  $\text{Fe}(\text{H}_2\text{O})_{42}^{3+} \rightarrow \text{Fe}(\text{OH})(\text{H}_2\text{O})_{41}^{2+} + \text{H}^+$ , taken from "Li, J.; Fisher, C. L.; Chen, J. L.; Bashford, D.; Noodleman, L. *Inorg. Chem.* **1996**, *35*, 4694."

<sup>b</sup> In alkaline solution. Taken from "Baes, C. J.; Mesmer, R. E. *The hydrolysis of Cations*; Krieger: Malabar, India, 1986".

<sup>c</sup> Ionic strength = 0. Taken from "Flynn, C. M., Jr. *Chem. Rev.* **1984**, *84*, 31".

### Cartesian coordinates of $\text{Fe}(\text{H}_2\text{O})_{42}^{2+}$

127

(Using OPBE potential, optimized in COSMO solvation model with  $\epsilon = 80$ )

|    |              |              |              |
|----|--------------|--------------|--------------|
| Fe | -0.001038164 | -0.010090621 | 0.000666714  |
| O  | 2.112100214  | 0.000469626  | 0.027312602  |
| O  | 0.019370243  | 2.120316773  | 0.001577353  |
| O  | -0.041990131 | 0.010562614  | -2.255024222 |
| O  | -2.115416916 | 0.022179515  | -0.025777757 |
| O  | -0.010399715 | -2.142210562 | 0.004247615  |
| O  | 0.003544132  | -0.057204517 | 2.239184787  |
| O  | 3.886178488  | -2.137209291 | -0.118468352 |
| O  | 3.833419531  | 2.171452985  | -0.179132020 |
| O  | -0.036777451 | 3.861543162  | 2.197242440  |
| O  | 0.144819069  | 3.849498473  | -2.208504516 |
| O  | -2.376226454 | 0.029220615  | -3.943388455 |
| O  | 2.273284010  | -0.087739619 | -3.989443202 |
| O  | -3.900700514 | -2.112138345 | 0.060133456  |
| O  | -3.755107779 | 2.249718433  | 0.223454955  |
| O  | -0.064063355 | -3.832982190 | 2.255197151  |

|   |              |              |              |
|---|--------------|--------------|--------------|
| O | 0.115452055  | -3.893083389 | -2.207023267 |
| O | -2.300595186 | -0.044380365 | 3.916606585  |
| O | 2.260066089  | -0.029125921 | 4.021116230  |
| H | 2.703161052  | -0.780819663 | -0.021826702 |
| H | 2.679036333  | 0.799810902  | -0.029802954 |
| H | -0.008556328 | 2.706542055  | 0.787440950  |
| H | 0.045862110  | 2.698096077  | -0.790786451 |
| H | -0.835191414 | 0.011542360  | -2.820193461 |
| H | 0.734766476  | -0.008778297 | -2.841588908 |
| H | -2.716805615 | -0.751937338 | 0.005480101  |
| H | -2.665629830 | 0.832410624  | 0.042339614  |
| H | -0.023446386 | -2.706848330 | 0.805857871  |
| H | 0.028341101  | -2.733852587 | -0.774817155 |
| H | -0.794879005 | -0.028625572 | 2.798380351  |
| H | 0.773519197  | -0.032452684 | 2.834635595  |
| H | 3.740512603  | -3.094241829 | -0.032971572 |
| H | 4.848383332  | -2.040306802 | -0.031804128 |
| H | 3.677903649  | 3.117101280  | -0.014037578 |
| H | 4.784236068  | 2.063181017  | -0.015117170 |
| H | -0.003454698 | 3.703653059  | 3.154692058  |
| H | 0.009363511  | 4.827717606  | 2.121667945  |
| H | 0.014732435  | 3.710173547  | -3.162523592 |
| H | 0.030853311  | 4.806789058  | -2.099819151 |
| H | -3.344380482 | 0.031670257  | -3.815591582 |
| H | -2.267955148 | 0.015770773  | -4.906047832 |
| H | 3.228132300  | -0.009660658 | -3.826842080 |
| H | 2.196315678  | 0.010050535  | -4.950726296 |
| H | -3.746435437 | -3.069322549 | 0.000403331  |
| H | -4.864683824 | -2.028773809 | -0.007132476 |
| H | -3.612281576 | 3.203455699  | 0.063465243  |
| H | -4.706097303 | 2.136813490  | 0.076406284  |
| H | -0.004431298 | -3.714785849 | 3.223823937  |
| H | -0.009275490 | -4.793274182 | 2.139274864  |
| H | 0.000214741  | -3.728948456 | -3.158778698 |
| H | 0.029175368  | -4.855631586 | -2.129018991 |
| H | -3.262255387 | -0.003993431 | 3.776136643  |
| H | -2.206368116 | -0.007465166 | 4.880160770  |
| H | 3.218964417  | -0.016955261 | 3.864523096  |
| H | 2.182027215  | -0.048588907 | 4.987511613  |
| O | 5.311967440  | 0.036153632  | -3.689618556 |
| H | 5.666120467  | 0.809021606  | -3.227741854 |
| H | 5.676361798  | -0.709671893 | -3.193698441 |
| O | 1.785328782  | 0.096082599  | -7.053202957 |
| H | 1.935885418  | 0.846888141  | -7.644890465 |
| H | 1.995416275  | -0.662317475 | -7.617003451 |
| O | -1.800282376 | -0.151197402 | -6.980476077 |
| H | -2.351688307 | 0.113895120  | -7.731115426 |
| H | -0.905418030 | 0.057537302  | -7.282709886 |
| O | -5.281529579 | 0.035650374  | -3.708120427 |
| H | -5.638630801 | -0.728779351 | -3.235420261 |
| H | -5.650935613 | 0.792657245  | -3.232157214 |
| O | -6.959616414 | -1.712098994 | -0.082948778 |
| H | -7.494325815 | -1.998659272 | 0.668027049  |
| H | -7.469457966 | -2.025887696 | -0.840633815 |
| O | -3.683682228 | -5.182558236 | -0.050429890 |
| H | -3.301790380 | -5.551671750 | -0.858914251 |
| H | -3.171164633 | -5.604631452 | 0.653404167  |
| O | -6.791210376 | 1.785622946  | -0.111727837 |

|   |              |              |              |
|---|--------------|--------------|--------------|
| H | -7.126770232 | 0.879025375  | -0.083846666 |
| H | -7.596930479 | 2.319502728  | -0.063964524 |
| O | -3.628014930 | 5.144597437  | -0.075501717 |
| H | -3.235322709 | 5.583238816  | 0.692191626  |
| H | -3.163180465 | 5.540899289  | -0.826170387 |
| O | 0.051414202  | 6.935818024  | 1.796422064  |
| H | 0.801884179  | 7.426973881  | 2.159690104  |
| H | -0.707624391 | 7.422812204  | 2.146257542  |
| O | 0.013540767  | 3.644571139  | 5.285267619  |
| H | -0.725380835 | 3.170138078  | 5.692054154  |
| H | 0.791338947  | 3.207876033  | 5.659924510  |
| O | -0.206755185 | 6.851639153  | -1.663753041 |
| H | -0.045354353 | 7.120775512  | -0.748747678 |
| H | 0.004472893  | 7.651979116  | -2.166885035 |
| O | -0.059494787 | 3.680479639  | -5.226953107 |
| H | 0.725142719  | 3.274439518  | -5.620659735 |
| H | -0.791769834 | 3.203453571  | -5.641118690 |
| O | 6.942871477  | -1.712307682 | 0.042847703  |
| H | 7.442184680  | -2.063047701 | -0.708869513 |
| H | 7.417089869  | -2.085773850 | 0.799668042  |
| O | 3.698744097  | -5.179224010 | 0.020868085  |
| H | 3.226080194  | -5.582381973 | 0.763249005  |
| H | 3.274236107  | -5.572641033 | -0.754674808 |
| O | 6.823473543  | 1.719252658  | 0.326850119  |
| H | 7.130229521  | 0.822015343  | 0.137797589  |
| H | 7.568944858  | 2.269210225  | 0.044648305  |
| O | 3.668990274  | 5.196743725  | 0.089099839  |
| H | 3.170838429  | 5.623492249  | -0.621930396 |
| H | 3.285549377  | 5.573610003  | 0.892280865  |
| O | -0.095687445 | -3.662276421 | -5.250037455 |
| H | -0.827980252 | -3.173268498 | -5.651794532 |
| H | 0.688342713  | -3.240858304 | -5.629657179 |
| O | -0.033926069 | -6.972799076 | -1.790849998 |
| H | -0.791204035 | -7.523820747 | -2.034698459 |
| H | 0.719012674  | -7.528466064 | -2.037552325 |
| O | 0.079424202  | -6.865912591 | 1.736028972  |
| H | 0.034854050  | -7.171308366 | 0.819578799  |
| H | 0.032650044  | -7.687852633 | 2.244270184  |
| O | 1.759594858  | -0.085154752 | 7.087612800  |
| H | 2.088876153  | -0.830660227 | 7.611568856  |
| H | 2.044687457  | 0.679707562  | 7.609349857  |
| O | 5.304956931  | 0.010287274  | 3.697383946  |
| H | 5.664517878  | -0.775584610 | 3.264512689  |
| H | 5.677644312  | 0.741387705  | 3.185428669  |
| O | -1.720530745 | 0.148049015  | 6.952189411  |
| H | -0.807640612 | -0.041805178 | 7.209149931  |
| H | -2.228596249 | -0.142815043 | 7.724146679  |
| O | -5.332994918 | 0.009334625  | 3.672806362  |
| H | -5.715295583 | 0.706213010  | 3.121822149  |
| H | -5.686500033 | -0.803697168 | 3.287432039  |
| O | 0.043626680  | -3.745900715 | 5.153807247  |
| H | 0.816132101  | -3.330776672 | 5.562599812  |
| H | -0.703975534 | -3.295931999 | 5.572232013  |

## Cartesian coordinates of $\text{Fe}(\text{OH})(\text{H}_2\text{O})_{41}^+$

126

|    |              |              |              |
|----|--------------|--------------|--------------|
| Fe | 0.001717368  | 0.175107618  | -0.162075091 |
| O  | 2.262570610  | 0.014238638  | -0.018024147 |
| O  | -0.020109949 | 2.065045798  | -0.351894409 |
| O  | 0.040320602  | -0.391455813 | -2.347164754 |
| O  | -2.257175750 | 0.005858503  | -0.190537038 |
| O  | 0.025094977  | -2.076792515 | 0.042534659  |
| O  | -0.002443247 | 0.146648024  | 2.129527077  |
| O  | 4.090742725  | -2.213597265 | -0.003029855 |
| O  | 3.938126869  | 2.308627665  | -0.107782392 |
| O  | -0.034799782 | 4.003349151  | 2.292350990  |
| O  | 0.236790457  | 3.686801947  | -2.344816816 |
| O  | -2.374184562 | 0.166888979  | -3.992075751 |
| O  | 2.253315841  | 0.328505059  | -4.052521957 |
| O  | -4.009288918 | -2.206115821 | 0.238788742  |
| O  | -3.884311806 | 2.314922100  | 0.227799022  |
| O  | -0.069738040 | -3.885385638 | 2.400661158  |
| O  | 0.030231226  | -4.097134030 | -2.203394958 |
| O  | -2.359933285 | 0.085278326  | 4.023595147  |
| O  | 2.327193143  | -0.120064490 | 4.096922657  |
| H  | 2.864882829  | -0.751740944 | -0.025441967 |
| H  | 2.823383564  | 0.810191926  | -0.081220254 |
| H  | -0.038117732 | 2.544344154  | 0.487286540  |
| H  | 0.137076266  | 3.049222976  | -1.543756162 |
| H  | -0.758081130 | -0.154705240 | -2.849584063 |
| H  | 0.794134371  | -0.091450570 | -2.892709256 |
| H  | -2.830810860 | -0.761068342 | 0.001611646  |
| H  | -2.793772742 | 0.802260302  | -0.012552511 |
| H  | -0.011650199 | -2.613141985 | 0.851081247  |
| H  | 0.013805945  | -2.702537097 | -0.698668567 |
| H  | -0.782153320 | 0.086111032  | 2.702236607  |
| H  | 0.765918257  | 0.036765203  | 2.709716909  |
| H  | 3.950212722  | -3.174970489 | 0.003618006  |
| H  | 5.058843153  | -2.114048946 | 0.002709709  |
| H  | 3.804619677  | 3.267068007  | 0.006825438  |
| H  | 4.892298928  | 2.193432615  | 0.021724940  |
| H  | -0.001907699 | 3.869423054  | 3.253658307  |
| H  | 0.023057094  | 4.968350700  | 2.206573684  |
| H  | -0.070240034 | 3.632314969  | -4.119753466 |
| H  | 0.114093150  | 4.574209124  | -1.978456255 |
| H  | -3.333752297 | 0.082981618  | -3.848907611 |
| H  | -2.282399587 | 0.077043211  | -4.952825863 |
| H  | 3.191285299  | 0.139399664  | -3.886546305 |
| H  | 2.153512155  | 0.161992382  | -5.003283149 |
| H  | -3.848376231 | -3.147760183 | 0.061493078  |
| H  | -4.959631632 | -2.097549628 | 0.062104861  |
| H  | -3.731732512 | 3.267300730  | 0.078853732  |
| H  | -4.836138524 | 2.212788407  | 0.074406511  |
| H  | -0.025005753 | -3.789712412 | 3.371231287  |
| H  | -0.028970537 | -4.844252115 | 2.267917275  |
| H  | -0.019387908 | -3.947577268 | -3.161351815 |
| H  | -0.000016305 | -5.064744067 | -2.118463390 |
| H  | -3.318848760 | -0.013773653 | 3.898437138  |
| H  | -2.238303798 | -0.064883164 | 4.974629939  |

|   |              |              |              |
|---|--------------|--------------|--------------|
| H | 3.286295861  | -0.042197992 | 3.962119719  |
| H | 2.228230365  | -0.070975447 | 5.061766348  |
| O | 5.325137090  | 0.014009169  | -3.678136675 |
| H | 5.674003738  | 0.769161168  | -3.184283174 |
| H | 5.671063115  | -0.749096426 | -3.195336742 |
| O | 1.652816756  | 0.019696800  | -7.104131790 |
| H | 2.042280521  | 0.777080658  | -7.563510362 |
| H | 2.062699565  | -0.730961994 | -7.556471625 |
| O | -1.819449352 | -0.186710600 | -7.021019799 |
| H | -2.331736950 | 0.227951619  | -7.730663310 |
| H | -0.905855296 | 0.017223344  | -7.265196380 |
| O | -5.348995899 | 0.037881091  | -3.691100845 |
| H | -5.648064851 | -0.739870321 | -3.199839538 |
| H | -5.676634145 | 0.779337455  | -3.162606887 |
| O | -6.981149365 | -1.667835535 | -0.069730016 |
| H | -7.451908017 | -2.075534646 | 0.671106851  |
| H | -7.383889491 | -2.101666922 | -0.835178332 |
| O | -3.660176156 | -5.272732946 | -0.042533483 |
| H | -3.234983005 | -5.574059904 | -0.857420404 |
| H | -3.109656783 | -5.657092733 | 0.654094574  |
| O | -6.894806430 | 1.802914777  | -0.244689978 |
| H | -7.186157437 | 0.891288235  | -0.105722175 |
| H | -7.663821170 | 2.322478000  | 0.030756040  |
| O | -3.638509263 | 5.229313109  | -0.038164319 |
| H | -3.178056137 | 5.595631040  | 0.729438418  |
| H | -3.122286371 | 5.553502664  | -0.789270035 |
| O | 0.079608577  | 7.108478467  | 1.802687819  |
| H | 0.830746521  | 7.567455906  | 2.204667105  |
| H | -0.677910580 | 7.568293718  | 2.191657200  |
| O | 0.034442424  | 3.675178118  | 5.410361473  |
| H | -0.692527281 | 3.136905618  | 5.753151276  |
| H | 0.822259374  | 3.226423134  | 5.747311085  |
| O | -0.151117506 | 6.763988001  | -1.586272370 |
| H | -0.029754837 | 7.038753149  | -0.666955855 |
| H | 0.041224933  | 7.575090764  | -2.079608058 |
| O | -0.154826723 | 3.710958837  | -5.098081533 |
| H | -0.942034877 | 3.187893584  | -5.298401824 |
| O | 7.029403477  | -1.720402866 | 0.040499629  |
| H | 7.456627648  | -2.139474977 | -0.719647990 |
| H | 7.431714290  | -2.183250925 | 0.789045520  |
| O | 3.739451753  | -5.281251115 | 0.010799674  |
| H | 3.215637074  | -5.625630513 | 0.747575597  |
| H | 3.274295718  | -5.611530380 | -0.770257324 |
| O | 6.944751403  | 1.728564045  | 0.337817383  |
| H | 7.208483696  | 0.816223457  | 0.154462527  |
| H | 7.682623988  | 2.243688912  | -0.018546035 |
| O | 3.717483666  | 5.296023713  | 0.127895333  |
| H | 3.164167646  | 5.622018378  | -0.595579923 |
| H | 3.240423807  | 5.572594032  | 0.922102320  |
| O | -0.075114042 | -3.678014237 | -5.295027178 |
| H | -0.823948515 | -3.158859467 | -5.619851958 |
| H | 0.694028971  | -3.193947048 | -5.626625323 |
| O | -0.007086034 | -7.093275850 | -1.684507497 |
| H | -0.765649662 | -7.528383784 | -2.098944537 |
| H | 0.742724999  | -7.524447594 | -2.118554563 |
| O | -0.134459820 | -6.936248225 | 1.777891947  |
| H | 0.006546803  | -7.209457657 | 0.860833641  |
| H | 0.116010894  | -7.724949872 | 2.280220901  |

|   |              |              |             |
|---|--------------|--------------|-------------|
| O | 1.747336076  | -0.052894513 | 7.146600928 |
| H | 2.148002777  | -0.802513743 | 7.609782059 |
| H | 2.117109478  | 0.705609139  | 7.620490352 |
| O | 5.380772574  | 0.026512484  | 3.716270749 |
| H | 5.697745121  | -0.768308772 | 3.265022730 |
| H | 5.711297380  | 0.746257361  | 3.160885505 |
| O | -1.739720649 | -0.436556820 | 7.024024130 |
| H | -0.816984415 | -0.215643389 | 7.213728663 |
| H | -2.223694401 | 0.098167128  | 7.669218833 |
| O | -5.411294244 | -0.097356810 | 3.700673017 |
| H | -5.759515862 | 0.711998684  | 3.301116786 |
| H | -5.721303269 | -0.793310890 | 3.105335083 |
| O | 0.017620439  | -3.731165155 | 5.316852039 |
| H | 0.816952123  | -3.303582631 | 5.654332262 |
| H | -0.700952695 | -3.209474343 | 5.700612929 |

### Cartesian coordinates of $\text{Fe}(\text{H}_2\text{O})_{42}^{3+}$

127

|    |              |              |              |
|----|--------------|--------------|--------------|
| Fe | -0.003106604 | -0.000060459 | -0.005589307 |
| O  | 2.025363831  | 0.013858980  | -0.002408877 |
| O  | -0.000770733 | 2.032653934  | -0.017070964 |
| O  | -0.009507577 | -0.002296448 | -2.046282726 |
| O  | -2.029228638 | 0.011665061  | -0.012595419 |
| O  | 0.001609294  | -2.031226694 | 0.003788348  |
| O  | -0.008087128 | 0.014032151  | 2.037924196  |
| O  | 3.703021348  | -2.016787600 | 0.007768522  |
| O  | 3.655442248  | 2.085417874  | -0.027045156 |
| O  | -0.002319878 | 3.711082225  | 2.036405684  |
| O  | 0.009748611  | 3.666366185  | -2.091755108 |
| O  | -2.094734983 | -0.025889901 | -3.701767069 |
| O  | 2.022418187  | -0.014397925 | -3.740703403 |
| O  | -3.706600075 | -2.010881447 | 0.048507464  |
| O  | -3.655171473 | 2.083388049  | 0.098260374  |
| O  | -0.009846169 | -3.676357644 | 2.077065957  |
| O  | 0.005324250  | -3.691470731 | -2.045541769 |
| O  | -2.113993963 | 0.031058993  | 3.678430521  |
| O  | 2.034729201  | -0.014049226 | 3.734483188  |
| H  | 2.623492065  | -0.787927229 | 0.000293540  |
| H  | 2.600684204  | 0.832554588  | -0.002972942 |
| H  | 0.002757305  | 2.625669298  | 0.785903409  |
| H  | -0.003372964 | 2.608113020  | -0.834630844 |
| H  | -0.823102020 | -0.002677945 | -2.622211380 |
| H  | 0.790681018  | -0.001580400 | -2.642625375 |
| H  | -2.626885827 | -0.791678888 | -0.007077970 |
| H  | -2.605112243 | 0.830196172  | 0.003451920  |
| H  | 0.002104980  | -2.611761824 | 0.816869709  |
| H  | -0.001319872 | -2.621098302 | -0.803436231 |
| H  | -0.824039479 | 0.010261671  | 2.608512311  |
| H  | 0.790279016  | 0.002943718  | 2.636148682  |
| H  | 3.558148648  | -2.976478332 | 0.013559987  |
| H  | 4.667461218  | -1.916227276 | -0.002181603 |
| H  | 3.520284692  | 3.049204608  | 0.026103816  |



|   |              |              |              |
|---|--------------|--------------|--------------|
| H | 4.617111934  | 1.974495031  | 0.016244254  |
| H | 0.019292048  | 3.560900945  | 2.995986900  |
| H | 0.011866027  | 4.675349796  | 1.942948547  |
| H | -0.016193694 | 3.532198087  | -3.056567549 |
| H | -0.014673350 | 4.627805044  | -1.978372572 |
| H | -3.055082088 | 0.009145972  | -3.547557725 |
| H | -2.005661437 | 0.010890016  | -4.665665747 |
| H | 2.981117501  | 0.010246787  | -3.590563553 |
| H | 1.925488371  | 0.002196569  | -4.704881223 |
| H | -3.559529230 | -2.966533894 | -0.045787024 |
| H | -4.667052607 | -1.905153284 | -0.028489345 |
| H | -3.503777702 | 3.038153596  | -0.022865323 |
| H | -4.612735018 | 1.978810500  | -0.009629213 |
| H | 0.017076499  | -3.535410237 | 3.040332585  |
| H | 0.011309027  | -4.639621061 | 1.973056263  |
| H | -0.022369884 | -3.552254915 | -3.007579405 |
| H | -0.013444987 | -4.654272405 | -1.938304230 |
| H | -3.074801843 | -0.003086812 | 3.528029216  |
| H | -2.023062020 | -0.003774998 | 4.642375499  |
| H | 2.995574126  | -0.018659196 | 3.585493285  |
| H | 1.941579536  | -0.012371606 | 4.698625593  |
| O | 5.029918397  | 0.031836251  | -3.509675250 |
| H | 5.636011909  | 0.754769611  | -3.300303305 |
| H | 5.593091293  | -0.752788487 | -3.454407235 |
| O | 1.886644135  | 0.010056671  | -6.798473881 |
| H | 1.900314329  | 0.774705707  | -7.390268018 |
| H | 1.836763278  | -0.738068670 | -7.408921246 |
| O | -1.820480071 | 0.042055724  | -6.774763302 |
| H | -2.405626577 | 0.029533897  | -7.545503467 |
| H | -0.937681498 | 0.036864408  | -7.168941219 |
| O | -5.077454276 | 0.020521866  | -3.620845193 |
| H | -5.573469621 | -0.732906685 | -3.271855089 |
| H | -5.584371840 | 0.785183249  | -3.314205751 |
| O | -6.754436063 | -1.844366338 | -0.061432236 |
| H | -7.370138769 | -1.894646009 | 0.682588160  |
| H | -7.337114630 | -1.916432830 | -0.829628912 |
| O | -3.643100314 | -5.039943435 | -0.064740184 |
| H | -3.377470161 | -5.541853659 | -0.847886460 |
| H | -3.264070446 | -5.550917753 | 0.664487478  |
| O | -6.695880709 | 1.777260453  | -0.100530859 |
| H | -7.090160238 | 0.894507901  | -0.106348328 |
| H | -7.464901219 | 2.363515978  | -0.070770284 |
| O | -3.627715192 | 5.029799235  | -0.070167335 |
| H | -3.256735660 | 5.529882218  | 0.669752633  |
| H | -3.325013902 | 5.520217220  | -0.846800610 |
| O | 0.024287079  | 6.782982867  | 1.883751515  |
| H | 0.785862099  | 7.365844513  | 2.010436821  |
| H | -0.726660589 | 7.378854420  | 2.012374185  |
| O | 0.027960616  | 3.609945540  | 5.086851385  |
| H | -0.730159708 | 3.274489868  | 5.586265073  |
| H | 0.787292473  | 3.300176092  | 5.600344788  |
| O | 0.010895788  | 6.721808007  | -1.674747410 |
| H | -0.022103773 | 7.048359924  | -0.765368970 |
| H | -0.021023888 | 7.532953581  | -2.201278218 |
| O | -0.028947417 | 3.643751214  | -5.040128310 |
| H | 0.726843962  | 3.311052002  | -5.543796020 |
| H | -0.791934648 | 3.336648027  | -5.549526817 |
| O | 6.763939989  | -1.795663906 | 0.022487711  |

|   |              |              |              |
|---|--------------|--------------|--------------|
| H | 7.348696858  | -1.930052920 | -0.736068329 |
| H | 7.344515375  | -1.972043186 | 0.775497622  |
| O | 3.626726180  | -5.038638560 | 0.018721465  |
| H | 3.330507859  | -5.552774276 | 0.783424307  |
| H | 3.314268572  | -5.559475448 | -0.734209685 |
| O | 6.703819920  | 1.733363983  | 0.104513945  |
| H | 7.040484882  | 0.827023376  | 0.102042449  |
| H | 7.508693461  | 2.269363821  | 0.076670018  |
| O | 3.633670009  | 5.025606767  | 0.049279878  |
| H | 3.249821671  | 5.544385581  | -0.671764876 |
| H | 3.354673636  | 5.504447028  | 0.842228423  |
| O | -0.041448521 | -3.682863634 | -5.060495671 |
| H | -0.797866588 | -3.330513384 | -5.550172531 |
| H | 0.718749828  | -3.323656203 | -5.539341677 |
| O | -0.031167609 | -6.767931169 | -1.859417849 |
| H | -0.795401661 | -7.356116636 | -1.932253507 |
| H | 0.717348819  | -7.374491032 | -1.943079523 |
| O | 0.027751706  | -6.729539813 | 1.756511839  |
| H | 0.039290281  | -7.109288706 | 0.867476791  |
| H | 0.029753855  | -7.508749446 | 2.330104306  |
| O | 1.926787350  | -0.017319331 | 6.823245685  |
| H | 1.998615555  | -0.778638821 | 7.415462609  |
| H | 1.971871709  | 0.733989017  | 7.430703487  |
| O | 5.054028299  | -0.004350940 | 3.662989999  |
| H | 5.567180652  | -0.754062820 | 3.330428884  |
| H | 5.528625289  | 0.762220439  | 3.311651134  |
| O | -1.745715418 | -0.067915284 | 6.757005833  |
| H | -0.837087703 | -0.046226349 | 7.086893279  |
| H | -2.273378213 | -0.031632976 | 7.567564915  |
| O | -5.111306573 | -0.040509134 | 3.628642968  |
| H | -5.608550943 | 0.744195110  | 3.356976163  |
| H | -5.587720795 | -0.765024532 | 3.200544642  |
| O | 0.025568364  | -3.655238694 | 5.043670408  |
| H | 0.793051986  | -3.341128278 | 5.541941460  |
| H | -0.724263003 | -3.299150475 | 5.540718975  |

### Cartesian coordinates of $\text{Fe}(\text{OH})(\text{H}_2\text{O})_{41}^{2+}$

126

TIME:

0.18000

|    |              |              |              |
|----|--------------|--------------|--------------|
| Fe | -0.020557456 | 0.170297938  | -0.020815064 |
| O  | 2.046956346  | 0.004491490  | -0.003115910 |
| O  | -0.023384977 | 2.008086737  | -0.058481547 |
| O  | 0.014844562  | -0.040735334 | -2.110329749 |
| O  | -2.079783370 | 0.007184876  | -0.026253732 |
| O  | -0.025202930 | -2.010211533 | 0.025663416  |
| O  | 0.009062018  | 0.007368352  | 2.094125685  |
| O  | 3.753983354  | -2.109717967 | 0.015750022  |
| O  | 3.746387069  | 2.104816786  | -0.021450458 |
| O  | -0.050404708 | 3.758689117  | 2.191065090  |
| O  | 0.121184669  | 3.772749899  | -2.272157685 |
| O  | -2.151112051 | -0.056503221 | -3.790645171 |
| O  | 2.121931919  | -0.000414465 | -3.812749295 |
| O  | -3.764326949 | -2.114967466 | 0.029314745  |

|   |              |              |              |
|---|--------------|--------------|--------------|
| O | -3.753059290 | 2.117547967  | 0.062713683  |
| O | 0.088407350  | -3.740246314 | 2.165711924  |
| O | 0.018387997  | -3.791461793 | -2.103835490 |
| O | -2.170281134 | 0.014172536  | 3.786087198  |
| O | 2.115458837  | -0.043489450 | 3.830595911  |
| H | 2.611849777  | -0.806633461 | 0.002640540  |
| H | 2.641624998  | 0.793953764  | -0.007079833 |
| H | -0.021250242 | 2.506019830  | 0.785567986  |
| H | 0.047856810  | 3.211191394  | -1.472806337 |
| H | -0.784242246 | -0.019619932 | -2.685844750 |
| H | 0.811652200  | -0.012937975 | -2.693215816 |
| H | -2.643095201 | -0.806607669 | -0.010498598 |
| H | -2.671471349 | 0.799926681  | -0.010358817 |
| H | 0.008604026  | -2.571941986 | 0.831239850  |
| H | -0.005800851 | -2.610408431 | -0.750990596 |
| H | -0.789479789 | 0.005459308  | 2.668509934  |
| H | 0.800860156  | -0.008603953 | 2.681265413  |
| H | 3.621412920  | -3.073939735 | 0.002045386  |
| H | 4.717584757  | -2.003568890 | 0.010833658  |
| H | 3.591984760  | 3.064918940  | 0.020093437  |
| H | 4.710801393  | 2.017493416  | 0.019555260  |
| H | 0.002064666  | 3.647103884  | 3.154508349  |
| H | 0.002626728  | 4.719060372  | 2.070452145  |
| H | -0.032400208 | 3.569418499  | -4.165600264 |
| H | 0.025624431  | 4.686646571  | -1.967698990 |
| H | -3.107420010 | -0.005351280 | -3.622853990 |
| H | -2.081691507 | -0.005232977 | -4.755885695 |
| H | 3.081172171  | 0.004469394  | -3.659106566 |
| H | 2.030202314  | 0.000362401  | -4.777931198 |
| H | -3.627255994 | -3.078395076 | -0.018611706 |
| H | -4.726946644 | -2.009326986 | -0.015948125 |
| H | -3.596125831 | 3.075773159  | -0.007767625 |
| H | -4.715657416 | 2.029975126  | -0.012055695 |
| H | 0.034859611  | -3.679173662 | 3.137759643  |
| H | -0.069457469 | -4.679309691 | 1.984390990  |
| H | -0.013689547 | -3.655869968 | -3.067349966 |
| H | -0.004441270 | -4.755352250 | -2.004842036 |
| H | -3.128430092 | -0.023388300 | 3.622312985  |
| H | -2.100917997 | -0.020965141 | 4.751828483  |
| H | 3.075928370  | -0.035986235 | 3.679067077  |
| H | 2.030543143  | -0.033313195 | 4.795996232  |
| O | 5.145101169  | 0.016439123  | -3.637136011 |
| H | 5.631829651  | 0.786060445  | -3.310586709 |
| H | 5.627905997  | -0.729871944 | -3.256063800 |
| O | 1.908811009  | -0.008916141 | -6.856015170 |
| H | 1.899197068  | 0.770322129  | -7.428328653 |
| H | 1.878157208  | -0.744151722 | -7.482712920 |
| O | -1.869397330 | 0.042063261  | -6.835601003 |
| H | -2.417452563 | 0.023940934  | -7.632824757 |
| H | -0.968446273 | 0.043115029  | -7.186404583 |
| O | -5.144337253 | 0.017052262  | -3.613090096 |
| H | -5.639992094 | -0.734877660 | -3.261139644 |
| H | -5.641978170 | 0.783149485  | -3.296400554 |
| O | -6.803270811 | -1.915176722 | -0.062656434 |
| H | -7.418663998 | -1.923567665 | 0.682850678  |
| H | -7.389209245 | -1.971346675 | -0.829685506 |
| O | -3.639543496 | -5.075619928 | -0.051951085 |
| H | -3.347372923 | -5.550409283 | -0.842450664 |

|   |              |              |              |
|---|--------------|--------------|--------------|
| H | -3.255237130 | -5.588800805 | 0.672635219  |
| O | -6.766171374 | 1.802363363  | -0.067916592 |
| H | -7.121492766 | 0.904479224  | -0.114570016 |
| H | -7.559293848 | 2.356509553  | -0.070254575 |
| O | -3.637098967 | 5.069420908  | -0.045682150 |
| H | -3.280940143 | 5.579573255  | 0.695239200  |
| H | -3.331955579 | 5.557350488  | -0.823482040 |
| O | 0.019792055  | 6.823626665  | 1.908949497  |
| H | 0.777126992  | 7.408324910  | 2.050250165  |
| H | -0.735402770 | 7.410483252  | 2.053105306  |
| O | 0.008140779  | 3.617124526  | 5.212608717  |
| H | -0.748147885 | 3.233791685  | 5.678799330  |
| H | 0.769643646  | 3.269110463  | 5.696870378  |
| O | 0.006033523  | 6.757865081  | -1.683916128 |
| H | -0.018567234 | 7.062513980  | -0.767051564 |
| H | -0.026257552 | 7.579893956  | -2.192454036 |
| O | -0.055028025 | 3.592578860  | -5.141211475 |
| H | -0.957887365 | 3.311588557  | -5.342429286 |
| O | 6.798399570  | -1.844851395 | 0.035119689  |
| H | 7.410980231  | -1.977920513 | -0.698026744 |
| H | 7.362525415  | -1.977987662 | 0.809919590  |
| O | 3.649780692  | -5.088409741 | 0.019607052  |
| H | 3.316718610  | -5.575439927 | 0.786549862  |
| H | 3.295563812  | -5.583850618 | -0.731805652 |
| O | 6.757323261  | 1.748670322  | 0.099763282  |
| H | 7.065771989  | 0.832601753  | 0.102593195  |
| H | 7.578446586  | 2.260114637  | 0.093442378  |
| O | 3.635846684  | 5.072052684  | 0.061169453  |
| H | 3.240983044  | 5.574289900  | -0.665465735 |
| H | 3.340983127  | 5.547423105  | 0.850158497  |
| O | -0.041413542 | -3.663941213 | -5.097210902 |
| H | -0.793261816 | -3.299755354 | -5.584970607 |
| H | 0.723579423  | -3.302319281 | -5.565481435 |
| O | -0.018828411 | -6.838241490 | -1.909808310 |
| H | -0.783450982 | -7.429552368 | -1.936226859 |
| H | 0.730542059  | -7.448555831 | -1.935901102 |
| O | -0.055848663 | -6.794059329 | 1.780333903  |
| H | 0.041411604  | -7.141013138 | 0.883171201  |
| H | 0.032043896  | -7.584916727 | 2.331740770  |
| O | 1.980516016  | -0.031721083 | 6.880209910  |
| H | 1.982854543  | -0.793846373 | 7.475302203  |
| H | 1.970665900  | 0.720289604  | 7.487899047  |
| O | 5.117763934  | -0.015759499 | 3.674061824  |
| H | 5.620261545  | -0.764420660 | 3.323361379  |
| H | 5.584606954  | 0.753659831  | 3.318285520  |
| O | -1.797791591 | -0.077203592 | 6.830652494  |
| H | -0.876209558 | -0.065630618 | 7.122236256  |
| H | -2.290909631 | -0.048861544 | 7.662983307  |
| O | -5.157212463 | -0.034273238 | 3.624948203  |
| H | -5.651501657 | 0.701383422  | 3.238135466  |
| H | -5.652302546 | -0.813101263 | 3.336666086  |
| O | 0.004905449  | -3.683087879 | 5.126866554  |
| H | 0.778564114  | -3.335881400 | 5.590524867  |
| H | -0.739393165 | -3.287822561 | 5.600674340  |

## Cartesian coordinates of Model-I with three explicit water molecules around site O2:

175

(Using OPBE potential, optimized in COSMO solvation model with  $\epsilon = 4$ )

|    |              |              |              |
|----|--------------|--------------|--------------|
| Fe | -0.007942423 | 0.365008027  | 0.474242346  |
| Fe | -1.076012740 | 0.046576972  | 3.027751066  |
| O  | 0.003812919  | -0.826600156 | 1.996915360  |
| O  | -1.425928948 | 1.055597217  | 1.628157292  |
| O  | -1.247417967 | -0.994652125 | -0.560490200 |
| H  | -2.017959053 | -1.235689604 | 0.047924467  |
| H  | -1.607364061 | -0.452139768 | -1.310333364 |
| C  | -1.044040105 | 2.922194892  | -3.026577216 |
| C  | -1.083516728 | 1.642323206  | -2.216177220 |
| O  | -1.833438308 | 0.689010150  | -2.589757136 |
| O  | -0.318824354 | 1.623408205  | -1.200505623 |
| C  | 3.531695486  | 3.392348460  | 1.385686625  |
| C  | 2.697330154  | 2.982863145  | 2.586507326  |
| C  | 1.570103402  | 1.978966278  | 2.341451040  |
| O  | 1.394028457  | 1.628394638  | 1.113799515  |
| O  | 0.918487036  | 1.586726559  | 3.329744172  |
| C  | 2.911483252  | 0.409583940  | -2.337362737 |
| C  | 2.744923772  | -0.793379342 | -1.475100205 |
| N  | 1.753351467  | -0.919834409 | -0.519276931 |
| C  | 3.493741274  | -1.949518173 | -1.491744706 |
| C  | 1.911211042  | -2.121626036 | 0.011253260  |
| N  | 2.946210598  | -2.774329347 | -0.542683859 |
| C  | 1.369111556  | 0.962448536  | -9.722462641 |
| C  | 0.472638275  | 0.482216493  | -8.617385886 |
| C  | 0.036255062  | -0.849276771 | -8.577562574 |
| C  | 0.070044531  | 1.322732637  | -7.576161593 |
| C  | -0.751619714 | -1.331999177 | -7.538751078 |
| C  | -0.720179308 | 0.857628253  | -6.527880445 |
| C  | -1.123864453 | -0.478316712 | -6.495701395 |
| O  | -1.884262651 | -0.996835917 | -5.482692435 |
| C  | -5.399641180 | 1.141298276  | 4.247399009  |
| C  | -4.123355233 | 1.749893371  | 3.678131618  |
| C  | -2.972877433 | 1.835638510  | 4.664271099  |
| O  | -3.101427509 | 2.490087140  | 5.728922701  |
| O  | -1.853053082 | 1.254449127  | 4.396132252  |
| C  | -3.268244692 | -4.547419741 | 2.510300354  |
| C  | -4.041152208 | -3.237027703 | 2.651432723  |
| C  | -3.226242240 | -2.050469234 | 2.136153126  |
| O  | -3.175827362 | -1.892742119 | 0.890092148  |
| O  | -2.663730836 | -1.336244237 | 3.030435153  |
| C  | -2.148816713 | -1.418622925 | 6.420853304  |
| C  | -0.764967293 | -1.607009318 | 5.910038747  |
| N  | -0.265820767 | -1.092458001 | 4.723443808  |
| C  | 0.240105654  | -2.312485574 | 6.525535302  |
| C  | 0.997226505  | -1.485321442 | 4.645112036  |
| N  | 1.338208339  | -2.219407479 | 5.712544815  |
| C  | 8.663600394  | -8.834038825 | -2.015985944 |
| C  | 7.432304029  | -7.993696227 | -2.151460457 |
| C  | 6.699729594  | -7.485302019 | -1.104783743 |
| C  | 6.797447941  | -7.508796042 | -3.343982414 |
| N  | 5.648850706  | -6.737417770 | -1.568743666 |
| C  | 5.675303203  | -6.728051308 | -2.937942552 |

|   |              |              |               |
|---|--------------|--------------|---------------|
| C | 7.060529863  | -7.636078787 | -4.721330978  |
| C | 4.828468515  | -6.095343373 | -3.850969536  |
| C | 6.222381816  | -7.005971026 | -5.631004871  |
| C | 5.117099336  | -6.243986360 | -5.201598631  |
| C | 1.990358620  | -5.243272036 | 2.464743585   |
| C | 3.241549430  | -5.923063047 | 1.918470625   |
| O | 3.688771347  | -6.915130893 | 2.575164445   |
| O | 3.757060264  | -5.456315499 | 0.855054619   |
| C | 6.456706094  | -3.642192412 | 6.925478525   |
| C | 5.215516417  | -3.873502941 | 6.099122075   |
| O | 4.134899007  | -3.326025225 | 6.369875139   |
| N | 5.352335538  | -4.730539270 | 5.069731061   |
| C | 4.057111330  | 2.013678664  | 8.144098780   |
| C | 2.626032579  | 2.413062297  | 7.987111452   |
| C | 1.809675971  | 2.086348149  | 6.929289393   |
| C | 1.813170200  | 3.190901770  | 8.882069832   |
| N | 0.553973799  | 2.604512290  | 7.110972654   |
| C | 0.517413171  | 3.286210798  | 8.297234332   |
| C | 2.038987521  | 3.821029853  | 10.120337799  |
| C | -0.531861744 | 3.981497890  | 8.906869925   |
| C | 0.997529514  | 4.511113740  | 10.729364747  |
| C | -0.274917545 | 4.590363071  | 10.128314001  |
| O | -4.381502278 | 1.251926521  | 8.351353093   |
| H | -1.147302002 | 3.786364440  | -2.362400209  |
| H | -0.060481002 | 3.005524245  | -3.504810330  |
| H | -1.821059847 | 2.952776739  | -3.793006256  |
| H | 4.051341469  | 2.534307248  | 0.944033172   |
| H | 2.912244212  | 3.838380868  | 0.599624478   |
| H | 4.289108975  | 4.129679474  | 1.682357003   |
| H | 2.225003712  | 3.860954088  | 3.049112792   |
| H | 3.330762836  | 2.551451625  | 3.373704803   |
| H | 3.827537735  | 0.327984897  | -2.930436575  |
| H | 2.069857675  | 0.518879543  | -3.031221562  |
| H | 2.958912120  | 1.325117363  | -1.739370801  |
| H | 4.346311740  | -2.245434753 | -2.091281274  |
| H | 1.292818727  | -2.546338098 | 0.787640280   |
| H | 3.256581844  | -3.698450327 | -0.249952259  |
| H | 2.198000000  | 0.260000000  | -9.844000000  |
| H | 0.843367276  | 1.022073467  | -10.685198486 |
| H | 1.785087417  | 1.951847229  | -9.505887383  |
| H | 0.333146950  | -1.536416631 | -9.371764136  |
| H | 0.383870443  | 2.367424346  | -7.571211946  |
| H | -1.068011858 | -2.373957798 | -7.515967371  |
| H | -1.020733194 | 1.536604763  | -5.733780025  |
| H | -1.887830695 | -0.368951953 | -4.741754465  |
| H | -6.179212204 | 1.132531950  | 3.475275315   |
| H | -5.239136966 | 0.105789943  | 4.570854618   |
| H | -5.779336064 | 1.713198105  | 5.100471937   |
| H | -4.327827145 | 2.779456539  | 3.356366516   |
| H | -3.803811207 | 1.195427410  | 2.794776655   |
| H | -2.340055089 | -4.526373354 | 3.095756516   |
| H | -3.871669545 | -5.392993554 | 2.865164673   |
| H | -3.002051793 | -4.737761935 | 1.463240516   |
| H | -4.311585614 | -3.070002366 | 3.699804640   |
| H | -4.965396925 | -3.291578123 | 2.061585740   |
| H | -2.301215532 | -2.040639022 | 7.308337853   |
| H | -2.326560007 | -0.377901965 | 6.704412471   |
| H | -2.892298112 | -1.688030303 | 5.666494170   |

|   |              |               |              |
|---|--------------|---------------|--------------|
| H | 0.260724843  | -2.860067611  | 7.459091867  |
| H | 1.673906538  | -1.254471029  | 3.836558858  |
| H | 2.249700282  | -2.630808427  | 5.882613412  |
| H | 9.468000000  | -8.258000000  | -1.545000000 |
| H | 8.488733475  | -9.716638642  | -1.386844650 |
| H | 9.026421825  | -9.188398510  | -2.984915053 |
| H | 6.858016880  | -7.599958498  | -0.039117793 |
| H | 4.956659837  | -6.299639728  | -0.974623719 |
| H | 7.912806694  | -8.216649477  | -5.074361752 |
| H | 3.977625836  | -5.501683795  | -3.516340540 |
| H | 6.424683173  | -7.095391473  | -6.697792189 |
| H | 4.480836215  | -5.757125170  | -5.939194049 |
| H | 1.606000000  | -5.719000000  | 3.376000000  |
| H | 2.201598420  | -4.189758171  | 2.678098514  |
| H | 1.206365101  | -5.257723421  | 1.698510049  |
| H | 6.513000000  | -4.433000000  | 7.686000000  |
| H | 7.373114941  | -3.682965680  | 6.327244848  |
| H | 6.382972496  | -2.676055444  | 7.429116439  |
| H | 6.226583947  | -5.199003621  | 4.890662710  |
| H | 4.541160535  | -5.039017407  | 4.555023389  |
| H | 4.382000000  | 1.434000000   | 7.275000000  |
| H | 4.722105816  | 2.883289175   | 8.235403910  |
| H | 4.215291374  | 1.395393704   | 9.038644009  |
| H | 2.032593284  | 1.519901104   | 6.034177359  |
| H | -0.218768066 | 2.480609808   | 6.471257193  |
| H | 3.015652655  | 3.766606410   | 10.602311199 |
| H | -1.512375016 | 4.044835660   | 8.436629379  |
| H | 1.163650668  | 4.996987163   | 11.690489764 |
| H | -1.072986261 | 5.138632824   | 10.627817584 |
| H | -3.962122292 | 1.608717770   | 7.552079799  |
| H | -5.079605089 | 1.895060296   | 8.533742578  |
| C | 2.674274874  | -11.456208583 | 1.971832925  |
| H | 3.196575117  | -10.568840069 | 1.616468207  |
| H | 2.053849178  | -11.861340700 | 1.163336277  |
| H | 2.028166000  | -11.148234000 | 2.797858000  |
| N | 3.610833121  | -12.458696615 | 2.441463716  |
| H | 3.208204839  | -13.269066398 | 2.889824680  |
| C | 4.906050771  | -12.547734467 | 2.142089209  |
| N | 5.563053879  | -11.553511805 | 1.556127614  |
| H | 6.546999436  | -11.680133458 | 1.376846119  |
| H | 5.212730399  | -10.582306602 | 1.550489919  |
| N | 5.557993409  | -13.707556089 | 2.386429929  |
| H | 6.553044818  | -13.646944552 | 2.549263461  |
| H | 5.089259254  | -14.403980286 | 2.946647843  |
| O | -4.840982131 | 4.689440202   | 6.189716055  |
| H | -4.254476109 | 3.934343909   | 5.962926366  |
| H | -4.476160094 | 5.413350011   | 5.663304688  |
| O | 8.620564876  | -5.595047484  | 2.629620382  |
| H | 9.359055324  | -4.977688877  | 2.539984396  |
| H | 7.898396466  | -5.140161879  | 2.150198512  |
| O | 4.905184581  | -8.872151476  | 1.366869646  |
| H | 4.461506578  | -8.080925559  | 1.821347375  |
| H | 4.743438819  | -8.714334805  | 0.429565423  |
| O | 6.504671250  | -4.245107718  | 1.202639635  |
| H | 6.312105349  | -3.381358965  | 1.590771185  |
| H | 5.632780366  | -4.680643495  | 1.168325558  |
| O | -2.552383326 | 3.587888010   | 1.103707306  |
| O | -5.277075182 | 2.658740901   | -0.216341585 |

|   |              |             |              |
|---|--------------|-------------|--------------|
| O | -4.484440940 | 1.662284105 | -3.162878466 |
| H | -1.943272399 | 3.921707061 | 0.432808137  |
| H | -2.150784033 | 2.724465662 | 1.345493190  |
| H | -4.415191018 | 2.877979757 | 0.175096196  |
| H | -5.040967026 | 2.291064588 | -1.082948521 |
| H | -4.983717052 | 0.938818025 | -3.567696654 |
| H | -3.599590771 | 1.271719778 | -3.006086756 |

## Cartesian coordinates of Model-II with three explicit water molecules around site O2:

176

(Using OPBE potential, optimized in COSMO solvation model with  $\epsilon = 4$ )

|    |              |              |              |
|----|--------------|--------------|--------------|
| Fe | 0.023048954  | 0.231649848  | 0.361418785  |
| Fe | -1.146469860 | -0.002190177 | 3.040548275  |
| O  | -0.157236488 | -0.858959079 | 1.941948669  |
| O  | -1.593234370 | 0.984484412  | 1.462180286  |
| O  | -1.312078990 | -1.040721312 | -0.638638185 |
| H  | -2.047500583 | -1.301781519 | -0.002822673 |
| H  | -1.688285020 | -0.465465523 | -1.355561669 |
| C  | -0.948719256 | 2.975037188  | -2.887570196 |
| C  | -1.025426656 | 1.644789575  | -2.174336190 |
| O  | -1.832600693 | 0.752516699  | -2.558396396 |
| O  | -0.214812494 | 1.518667835  | -1.193238274 |
| C  | 3.441308583  | 3.258433198  | 1.553213597  |
| C  | 2.559576280  | 2.812189133  | 2.705705678  |
| C  | 1.399568771  | 1.886850049  | 2.366767213  |
| O  | 1.311647143  | 1.515676467  | 1.137998961  |
| O  | 0.622309646  | 1.555919657  | 3.290322615  |
| C  | 2.808161161  | 0.249658700  | -2.320059963 |
| C  | 2.642939780  | -0.916026156 | -1.409519518 |
| N  | 1.644136101  | -1.026085237 | -0.455024354 |
| C  | 3.399220230  | -2.065247611 | -1.370172593 |
| C  | 1.809634573  | -2.211683705 | 0.119172420  |
| N  | 2.851471342  | -2.866815146 | -0.401342726 |
| C  | 1.569182321  | 1.071884147  | -9.480630924 |
| C  | 0.675527955  | 0.555592287  | -8.391380828 |
| C  | 0.215449011  | -0.767626541 | -8.407126958 |
| C  | 0.271247295  | 1.366154953  | -7.327030034 |
| C  | -0.606241704 | -1.271664697 | -7.404459749 |
| C  | -0.553052500 | 0.880268799  | -6.316219840 |
| C  | -0.989616270 | -0.446174075 | -6.344678781 |
| O  | -1.792013798 | -0.981231716 | -5.372351653 |
| C  | -5.509514473 | 0.846661629  | 4.322740591  |
| C  | -4.332417200 | 1.534132351  | 3.637576386  |
| C  | -3.143164932 | 1.758841419  | 4.546447127  |
| O  | -3.226701981 | 2.497864165  | 5.541414215  |
| O  | -1.998000576 | 1.187720049  | 4.280238321  |
| C  | -3.155041779 | -4.653301797 | 2.565947331  |
| C  | -3.930515073 | -3.349899281 | 2.747784862  |
| C  | -3.171940727 | -2.151329197 | 2.187075545  |
| O  | -3.105698887 | -2.030596741 | 0.943875747  |
| O  | -2.671990591 | -1.357115279 | 3.064591305  |
| C  | -1.969892786 | -1.369698049 | 6.501511802  |
| C  | -0.623951783 | -1.550337159 | 5.897365380  |



|   |              |              |               |
|---|--------------|--------------|---------------|
| N | -0.207528352 | -1.057209368 | 4.668955506   |
| C | 0.430126316  | -2.232060508 | 6.454362199   |
| C | 1.054167551  | -1.440519898 | 4.511792613   |
| N | 1.469205053  | -2.146153012 | 5.568577732   |
| C | 8.603505970  | -8.824141838 | -1.907388116  |
| C | 7.398226026  | -7.939851821 | -1.963277675  |
| C | 6.731687962  | -7.434944256 | -0.872106437  |
| C | 6.736305487  | -7.393392038 | -3.113751057  |
| N | 5.692204373  | -6.632861850 | -1.269609912  |
| C | 5.665501449  | -6.581871509 | -2.637891707  |
| C | 6.938249149  | -7.488585211 | -4.504025406  |
| C | 4.806063823  | -5.892062184 | -3.496422923  |
| C | 6.089156184  | -6.799273127 | -5.359586684  |
| C | 5.032115915  | -6.010352093 | -4.862273546  |
| C | 1.978931754  | -5.184011270 | 2.491851896   |
| C | 3.317053123  | -5.715022771 | 1.982182622   |
| O | 3.900247194  | -6.597507284 | 2.675780144   |
| O | 3.774715785  | -5.230067790 | 0.892594809   |
| C | 6.475502218  | -3.652662426 | 6.914758890   |
| C | 5.316737524  | -3.934912879 | 5.987691206   |
| O | 4.253780216  | -3.294097758 | 6.051042723   |
| N | 5.507165633  | -4.938930696 | 5.114058019   |
| C | 3.994830717  | 1.987560916  | 8.136326677   |
| C | 2.568798042  | 2.370149504  | 7.905758734   |
| C | 1.817603969  | 2.036067106  | 6.804080421   |
| C | 1.695541549  | 3.135186886  | 8.754528580   |
| N | 0.547059902  | 2.538717494  | 6.912033617   |
| C | 0.434093721  | 3.216158592  | 8.097295540   |
| C | 1.841250892  | 3.764715790  | 10.004657847  |
| C | -0.657317647 | 3.894921687  | 8.645492422   |
| C | 0.757737318  | 4.440063852  | 10.552810494  |
| C | -0.478727682 | 4.505319986  | 9.880348312   |
| O | -4.470900209 | 1.525470787  | 8.534742841   |
| H | -1.075157437 | 3.784857672  | -2.160724346  |
| H | 0.052896623  | 3.094692958  | -3.316832366  |
| H | -1.697613776 | 3.070345768  | -3.675551540  |
| H | 3.933463107  | 2.408647765  | 1.067593950   |
| H | 2.865673165  | 3.788734713  | 0.786271267   |
| H | 4.221523098  | 3.936503464  | 1.920844978   |
| H | 2.124015822  | 3.674726109  | 3.227716062   |
| H | 3.154518575  | 2.288526237  | 3.466969753   |
| H | 3.743552406  | 0.157054037  | -2.879616952  |
| H | 1.989822754  | 0.305502840  | -3.047611396  |
| H | 2.822237031  | 1.194835435  | -1.768296132  |
| H | 4.261902656  | -2.366304681 | -1.951959565  |
| H | 1.184404868  | -2.617560850 | 0.898051732   |
| H | 3.186774834  | -3.773709386 | -0.032343997  |
| H | 2.198000000  | 0.259999000  | -9.844000000  |
| H | 0.993978044  | 1.455005511  | -10.335104795 |
| H | 2.216080520  | 1.882587775  | -9.128378585  |
| H | 0.513883846  | -1.430725234 | -9.220480433  |
| H | 0.609866850  | 2.401904862  | -7.275548218  |
| H | -0.947022031 | -2.305819481 | -7.427607177  |
| H | -0.855713174 | 1.536191295  | -5.504906946  |
| H | -1.833104680 | -0.356980383 | -4.631005660  |
| H | -6.337977866 | 0.743308216  | 3.611629094   |
| H | -5.241556328 | -0.156880147 | 4.670860259   |
| H | -5.871336840 | 1.425692972  | 5.179888136   |

|   |              |               |              |
|---|--------------|---------------|--------------|
| H | -4.644735943 | 2.528588084   | 3.298482152  |
| H | -4.027386239 | 0.968625663   | 2.755442087  |
| H | -2.197093577 | -4.627963149  | 3.101435991  |
| H | -3.735485911 | -5.497843392  | 2.957898385  |
| H | -2.947035603 | -4.847306635  | 1.507050796  |
| H | -4.147024352 | -3.181637435  | 3.807804938  |
| H | -4.885232437 | -3.413982143  | 2.208955652  |
| H | -2.033154091 | -1.953705494  | 7.424306967  |
| H | -2.157105061 | -0.321794548  | 6.753169709  |
| H | -2.763517416 | -1.698587831  | 5.825904661  |
| H | 0.519976335  | -2.760146853  | 7.394749130  |
| H | 1.677802033  | -1.218384920  | 3.659878987  |
| H | 2.392585005  | -2.552280404  | 5.684113206  |
| H | 9.467999000  | -8.258000000  | -1.545000000 |
| H | 8.460032679  | -9.667301361  | -1.219763579 |
| H | 8.856625510  | -9.237217623  | -2.888166614 |
| H | 6.931153361  | -7.588223757  | 0.181960498  |
| H | 5.046734188  | -6.173947638  | -0.636309175 |
| H | 7.752792600  | -8.088857093  | -4.909494475 |
| H | 3.990422291  | -5.280816905  | -3.110114128 |
| H | 6.245450125  | -6.861447080  | -6.436014696 |
| H | 4.384966230  | -5.477448813  | -5.557583356 |
| H | 1.606000000  | -5.719000000  | 3.376000000  |
| H | 2.084650462  | -4.125630939  | 2.754529258  |
| H | 1.230264230  | -5.244133465  | 1.693879544  |
| H | 6.513000000  | -4.432999000  | 7.686000000  |
| H | 7.434416718  | -3.664030778  | 6.384652070  |
| H | 6.329346526  | -2.684199994  | 7.396490887  |
| H | 6.385146103  | -5.432379376  | 5.072316150  |
| H | 4.776297897  | -5.237677199  | 4.482269360  |
| H | 4.382000000  | 1.434002000   | 7.274999000  |
| H | 4.637804280  | 2.865097265   | 8.287246088  |
| H | 4.111388157  | 1.350753063   | 9.024139885  |
| H | 2.102106842  | 1.465605047   | 5.930741803  |
| H | -0.185625181 | 2.410956437   | 6.228781106  |
| H | 2.788782145  | 3.720820753   | 10.542128867 |
| H | -1.610596398 | 3.946379915   | 8.121238961  |
| H | 0.862053860  | 4.926567574   | 11.522166198 |
| H | -1.311322710 | 5.041831048   | 10.333628105 |
| H | -4.096103000 | 1.815383374   | 7.691270519  |
| H | -5.303529388 | 2.014889036   | 8.580654901  |
| C | 2.705647099  | -11.464227350 | 2.002426682  |
| H | 3.220501220  | -10.571648059 | 1.648238924  |
| H | 2.123519652  | -11.904256434 | 1.183729755  |
| H | 2.028166000  | -11.148234000 | 2.797858000  |
| N | 3.639278935  | -12.429605995 | 2.547990334  |
| H | 3.243839281  | -13.172956759 | 3.105539021  |
| C | 4.927544914  | -12.560619406 | 2.234429650  |
| N | 5.565871798  | -11.637240051 | 1.510625532  |
| H | 6.562200718  | -11.746182093 | 1.396382975  |
| H | 5.228829004  | -10.673465820 | 1.513351208  |
| N | 5.592199219  | -13.643537165 | 2.663833364  |
| H | 6.563212121  | -13.762290992 | 2.424072969  |
| H | 5.088904418  | -14.466408413 | 2.955666893  |
| O | -4.610030363 | 5.306469813   | 5.463849173  |
| H | -4.180161286 | 4.435490320   | 5.477239994  |
| H | -4.029011923 | 5.822797950   | 4.888139017  |
| O | 8.694099020  | -5.422121715  | 2.349874681  |

|   |              |              |              |
|---|--------------|--------------|--------------|
| H | 9.325746562  | -4.753486990 | 2.647063619  |
| H | 7.981142561  | -4.883856276 | 1.952544016  |
| O | 4.668412518  | -8.843883559 | 1.404771077  |
| H | 4.440971362  | -7.993238326 | 1.868480496  |
| H | 4.607406865  | -8.616505476 | 0.469151454  |
| O | 6.576685494  | -3.848529904 | 1.089256113  |
| H | 6.421739744  | -3.002946477 | 1.530868271  |
| H | 5.713111105  | -4.292657553 | 1.133372467  |
| H | -1.782059990 | 1.946768639  | 1.562675693  |
| O | -2.614014653 | 3.589650672  | 1.286746677  |
| O | -4.798433060 | 2.389841493  | -0.109515742 |
| O | -4.417536514 | 1.875578354  | -3.140335612 |
| H | -2.119834456 | 4.133093403  | 0.660397999  |
| H | -3.354330310 | 3.234554876  | 0.747657956  |
| H | -5.620287837 | 2.895088143  | -0.048609025 |
| H | -4.711979296 | 2.235617024  | -1.066578180 |
| H | -4.990275102 | 1.183292544  | -3.485969886 |
| H | -3.551991816 | 1.432357599  | -3.031289396 |

### Cartesian coordinates of Model-I-SO<sub>4</sub><sup>2-</sup>:

189

(Using OPBE potential, optimized in COSMO solvation model with  $\epsilon = 10$ .)

|    |              |              |              |
|----|--------------|--------------|--------------|
| Fe | -0.011831201 | 0.334737042  | 0.495236000  |
| Fe | -1.084583058 | 0.001156930  | 3.042470808  |
| O  | 0.023399395  | -0.851157471 | 2.018868450  |
| O  | -1.461481113 | 0.979734591  | 1.644674059  |
| O  | -1.222449482 | -1.078146377 | -0.546343393 |
| H  | -2.029549910 | -1.232078723 | 0.024467361  |
| H  | -1.512445977 | -0.555972456 | -1.350817727 |
| C  | -1.246217343 | 2.820007696  | -3.007448937 |
| C  | -1.128253766 | 1.541724618  | -2.203981817 |
| O  | -1.676806663 | 0.488124834  | -2.632821808 |
| O  | -0.444114920 | 1.630187148  | -1.126640570 |
| C  | 3.504327027  | 3.420511210  | 1.373270985  |
| C  | 2.683240422  | 3.000263236  | 2.579640488  |
| C  | 1.554281979  | 1.996829448  | 2.346589803  |
| O  | 1.361961556  | 1.642597193  | 1.120513244  |
| O  | 0.908660747  | 1.607251862  | 3.340396695  |
| C  | 2.875459326  | 0.420378274  | -2.346343869 |
| C  | 2.710201289  | -0.780968379 | -1.482057665 |
| N  | 1.727404933  | -0.908397472 | -0.515180854 |
| C  | 3.458044711  | -1.937554072 | -1.505452815 |
| C  | 1.891601018  | -2.111762798 | 0.012859223  |
| N  | 2.919722218  | -2.762175740 | -0.551886336 |
| C  | 1.387057075  | 0.979548541  | -9.711099040 |
| C  | 0.477646548  | 0.502517441  | -8.615593659 |
| C  | 0.053146472  | -0.833492802 | -8.569976410 |
| C  | 0.051874541  | 1.348361719  | -7.587181312 |
| C  | -0.744483601 | -1.314838867 | -7.537016389 |
| C  | -0.748866947 | 0.884395353  | -6.544877833 |
| C  | -1.141150269 | -0.455178825 | -6.507713312 |
| O  | -1.909037339 | -0.972972047 | -5.502126625 |
| C  | -5.389046668 | 1.177095930  | 4.154252836  |

|   |              |              |              |
|---|--------------|--------------|--------------|
| C | -4.103614924 | 1.800893861  | 3.618569821  |
| C | -2.977133763 | 1.856364937  | 4.636619024  |
| O | -3.119239942 | 2.530592559  | 5.690214561  |
| O | -1.877691546 | 1.226694587  | 4.413194730  |
| C | -3.247335705 | -4.529619653 | 2.472782738  |
| C | -4.070671555 | -3.249652630 | 2.613634110  |
| C | -3.289138588 | -2.028596167 | 2.132692260  |
| O | -3.320434546 | -1.762418670 | 0.901067074  |
| O | -2.657703832 | -1.392975612 | 3.038656641  |
| C | -2.141616789 | -1.410697250 | 6.443524824  |
| C | -0.761059521 | -1.606768940 | 5.927210789  |
| N | -0.265982771 | -1.099039010 | 4.735757445  |
| C | 0.246126684  | -2.310380900 | 6.541830157  |
| C | 0.997344874  | -1.492371087 | 4.654408190  |
| N | 1.340358648  | -2.221140395 | 5.723394847  |
| C | 8.651145909  | -8.820001412 | -2.015707272 |
| C | 7.431090395  | -7.962088719 | -2.145805914 |
| C | 6.698489295  | -7.463644959 | -1.094568013 |
| C | 6.797748579  | -7.461106471 | -3.333384362 |
| N | 5.650966514  | -6.705847118 | -1.550442224 |
| C | 5.677039686  | -6.682410116 | -2.919156583 |
| C | 7.056484822  | -7.578683299 | -4.712334669 |
| C | 4.827926519  | -6.041892882 | -3.826246978 |
| C | 6.216280892  | -6.941858060 | -5.616293968 |
| C | 5.111833874  | -6.181849603 | -5.179485073 |
| C | 1.969990708  | -5.218354234 | 2.469085881  |
| C | 3.257132090  | -5.841081057 | 1.938805104  |
| O | 3.768860840  | -6.775239957 | 2.627536525  |
| O | 3.741731888  | -5.383360055 | 0.855297628  |
| C | 6.456954084  | -3.631269009 | 6.936680780  |
| C | 5.211145913  | -3.843821600 | 6.115188810  |
| O | 4.133780321  | -3.290546667 | 6.402329309  |
| N | 5.338244426  | -4.678569259 | 5.068696275  |
| C | 4.051760155  | 2.038995445  | 8.126486159  |
| C | 2.619873046  | 2.437818784  | 7.959904857  |
| C | 1.812423372  | 2.118823423  | 6.891859474  |
| C | 1.797584208  | 3.205461793  | 8.855990377  |
| N | 0.553542717  | 2.632165388  | 7.067989410  |
| C | 0.504783076  | 3.302554831  | 8.262096258  |
| C | 2.011304772  | 3.826777366  | 10.100516471 |
| C | -0.553342001 | 3.986133302  | 8.870766688  |
| C | 0.964119301  | 4.508842185  | 10.708198263 |
| C | -0.305610019 | 4.587350476  | 10.099431799 |
| O | -4.362847207 | 1.336154689  | 8.339102503  |
| H | -1.411114970 | 3.672436666  | -2.340677582 |
| H | -0.298344082 | 2.998727130  | -3.531366315 |
| H | -2.051920152 | 2.759170960  | -3.743114217 |
| H | 4.015091082  | 2.566099515  | 0.914916298  |
| H | 2.879613709  | 3.882349846  | 0.600357929  |
| H | 4.268486585  | 4.149987649  | 1.671595322  |
| H | 2.216152620  | 3.875213370  | 3.053585167  |
| H | 3.327116514  | 2.564405996  | 3.355847508  |
| H | 3.778364311  | 0.323505959  | -2.956951587 |
| H | 2.023044613  | 0.543556876  | -3.024594035 |
| H | 2.952270829  | 1.335687688  | -1.750782765 |
| H | 4.304133970  | -2.233900499 | -2.113892567 |
| H | 1.280617193  | -2.537661507 | 0.794060193  |
| H | 3.233779550  | -3.684464932 | -0.254650197 |

|   |              |              |               |
|---|--------------|--------------|---------------|
| H | 2.198000000  | 0.260000000  | -9.844000000  |
| H | 0.863471128  | 1.069176459  | -10.672782846 |
| H | 1.826612433  | 1.954976045  | -9.477405410  |
| H | 0.368024461  | -1.524102054 | -9.353376395  |
| H | 0.360014473  | 2.394458380  | -7.583454286  |
| H | -1.049580418 | -2.360067105 | -7.509909152  |
| H | -1.060971459 | 1.565681004  | -5.756634429  |
| H | -1.942339916 | -0.335549901 | -4.768559404  |
| H | -6.157141571 | 1.173338690  | 3.370712647   |
| H | -5.226946755 | 0.138479600  | 4.466963404   |
| H | -5.785600084 | 1.733637591  | 5.010309921   |
| H | -4.301853085 | 2.838026162  | 3.314372989   |
| H | -3.762459097 | 1.264523293  | 2.731451547   |
| H | -2.326007146 | -4.475843385 | 3.066265194   |
| H | -3.823329944 | -5.396711823 | 2.820086081   |
| H | -2.965720969 | -4.709155002 | 1.427464908   |
| H | -4.357695217 | -3.106150023 | 3.661474997   |
| H | -4.985164348 | -3.331234221 | 2.012704075   |
| H | -2.286061991 | -2.017393602 | 7.342684244   |
| H | -2.317782244 | -0.364320555 | 6.707552269   |
| H | -2.891478359 | -1.694593333 | 5.700737684   |
| H | 0.270185853  | -2.857134466 | 7.475766664   |
| H | 1.671155518  | -1.267011555 | 3.842159766   |
| H | 2.252227042  | -2.635515204 | 5.888743482   |
| H | 9.468000000  | -8.257999000 | -1.544999000  |
| H | 8.463793245  | -9.697112454 | -1.383300979  |
| H | 9.003464930  | -9.181881458 | -2.985620707  |
| H | 6.844437026  | -7.603707341 | -0.030481249  |
| H | 4.954535407  | -6.280683532 | -0.952073151  |
| H | 7.904221008  | -8.162410893 | -5.071021579  |
| H | 3.973976674  | -5.456295052 | -3.484762344  |
| H | 6.411012369  | -7.032163472 | -6.684475651  |
| H | 4.467755385  | -5.697303273 | -5.912052799  |
| H | 1.606001000  | -5.719001000 | 3.375999000   |
| H | 2.137980738  | -4.159381746 | 2.693668223   |
| H | 1.192846589  | -5.259505651 | 1.697139043   |
| H | 6.513000000  | -4.433000000 | 7.686000000   |
| H | 7.369702724  | -3.675704554 | 6.333865692   |
| H | 6.394917306  | -2.672134935 | 7.454904857   |
| H | 6.203303208  | -5.170245257 | 4.904551124   |
| H | 4.524030263  | -4.991936294 | 4.560220149   |
| H | 4.382000000  | 1.434001000  | 7.275000000   |
| H | 4.717171084  | 2.909779944  | 8.198381701   |
| H | 4.205550082  | 1.445290402  | 9.037516548   |
| H | 2.044012447  | 1.559597885  | 5.994266059   |
| H | -0.216878525 | 2.502877546  | 6.427153778   |
| H | 2.986984885  | 3.774807470  | 10.586919578  |
| H | -1.530609763 | 4.049257349  | 8.396203120   |
| H | 1.123307428  | 4.992168937  | 11.671159880  |
| H | -1.109165553 | 5.128900512  | 10.597314806  |
| H | -3.960818069 | 1.675657704  | 7.523417238   |
| H | -5.114827518 | 1.928971778  | 8.475402317   |
| O | -4.840191530 | 4.736320748  | 6.105875929   |
| H | -4.252403587 | 3.974694118  | 5.899214016   |
| H | -4.429034363 | 5.466798596  | 5.623012351   |
| O | 8.654812181  | -5.575606994 | 2.504976217   |
| H | 9.346071821  | -4.899905299 | 2.536866456   |
| H | 7.905232067  | -5.100816791 | 2.093843282   |

|   |              |               |             |
|---|--------------|---------------|-------------|
| O | 4.934747284  | -8.780462500  | 1.344509728 |
| H | 4.518276090  | -7.992063302  | 1.799508221 |
| H | 4.651564153  | -8.684811894  | 0.427496570 |
| O | 6.462314775  | -4.178861516  | 1.201133570 |
| H | 6.278707222  | -3.342069037  | 1.648050977 |
| H | 5.594255577  | -4.624982604  | 1.178691291 |
| C | 2.684672848  | -11.430271439 | 1.979531028 |
| H | 3.206970219  | -10.518885926 | 1.690634625 |
| H | 2.111155627  | -11.805042500 | 1.122095205 |
| H | 1.990574350  | -11.175898543 | 2.784626764 |
| N | 3.605072176  | -12.436113497 | 2.467404951 |
| H | 3.189295984  | -13.192491163 | 2.997795222 |
| C | 4.887087191  | -12.575216484 | 2.133257320 |
| N | 5.526811893  | -11.629280412 | 1.425591404 |
| H | 6.527194063  | -11.738415113 | 1.345101483 |
| H | 5.211768353  | -10.660799637 | 1.492681782 |
| N | 5.529353452  | -13.706342982 | 2.443662034 |
| H | 6.537899927  | -13.693135929 | 2.456233561 |
| H | 5.070897823  | -14.411807882 | 3.023629526 |
| O | 4.116506206  | -15.597685432 | 4.034738492 |
| S | 3.561257306  | -16.653106680 | 4.931778367 |
| O | 2.147415655  | -16.275810972 | 5.299609418 |
| O | 3.554429064  | -17.969967339 | 4.214917176 |
| O | 4.393551351  | -16.749462398 | 6.173746115 |
| H | 4.069472939  | -18.006207290 | 7.850384254 |
| O | 4.031026996  | -18.555895352 | 8.653626855 |
| H | 4.479530638  | -18.004121588 | 9.308790035 |
| H | 5.904900154  | -15.230372143 | 6.267595502 |
| O | 6.638794040  | -14.610216174 | 6.428378288 |
| H | 6.839745208  | -14.757387105 | 7.363109348 |
| H | 3.892565314  | -17.779016778 | 2.129420237 |
| O | 4.055100931  | -17.826019725 | 1.169464445 |
| H | 3.639832092  | -18.663405008 | 0.921830441 |
| H | 2.548821037  | -19.631172789 | 4.819005313 |
| O | 2.127881834  | -20.488957678 | 5.017264942 |
| H | 2.208162894  | -20.962089986 | 4.177919764 |
| H | 0.990204809  | -17.234036088 | 6.438346718 |
| O | 0.322166408  | -17.652338585 | 7.023876841 |
| H | -0.455880633 | -17.093646550 | 6.891776969 |
| H | 1.544556286  | -14.708277128 | 4.493568370 |
| O | 1.206799810  | -13.900152216 | 4.046634646 |
| H | 0.412636356  | -13.680711592 | 4.552653569 |

### Cartesian coordinates of Model-II-SO<sub>4</sub><sup>2-</sup>:

190

|    |              |              |              |
|----|--------------|--------------|--------------|
| Fe | 0.038467012  | 0.216608062  | 0.359085001  |
| Fe | -1.159180386 | -0.034661770 | 3.060550366  |
| O  | -0.184682468 | -0.872642762 | 1.940164829  |
| O  | -1.604746556 | 1.047520278  | 1.501950849  |
| O  | -1.302064048 | -1.029062086 | -0.640435013 |
| H  | -2.057038837 | -1.276544775 | -0.036136033 |
| H  | -1.644636208 | -0.450008142 | -1.387369260 |
| C  | -1.031342856 | 2.950829330  | -2.864170044 |

|   |              |              |              |
|---|--------------|--------------|--------------|
| C | -1.048184903 | 1.626835095  | -2.140887418 |
| O | -1.772904876 | 0.683568482  | -2.548010465 |
| O | -0.272030623 | 1.564229454  | -1.115490787 |
| C | 3.443608167  | 3.256658638  | 1.548460479  |
| C | 2.562110238  | 2.818863996  | 2.704420022  |
| C | 1.411078732  | 1.881616541  | 2.374780480  |
| O | 1.335315622  | 1.479408165  | 1.154476668  |
| O | 0.617835942  | 1.570064468  | 3.292752793  |
| C | 2.761836071  | 0.233236476  | -2.344699270 |
| C | 2.610257741  | -0.929011005 | -1.428133976 |
| N | 1.624364318  | -1.035741804 | -0.459931905 |
| C | 3.365176671  | -2.079277484 | -1.392737847 |
| C | 1.796162504  | -2.219951261 | 0.118179481  |
| N | 2.831221436  | -2.875036228 | -0.412406395 |
| C | 1.588227315  | 1.071959231  | -9.447485022 |
| C | 0.692461250  | 0.561270549  | -8.355662382 |
| C | 0.215099407  | -0.756756825 | -8.362097987 |
| C | 0.295283772  | 1.384724996  | -7.297521957 |
| C | -0.621572902 | -1.239777611 | -7.359369591 |
| C | -0.543295523 | 0.921061960  | -6.288647972 |
| C | -1.003802956 | -0.396939274 | -6.311954271 |
| O | -1.822590782 | -0.905727708 | -5.341954648 |
| C | -5.511009060 | 0.815259811  | 4.318405591  |
| C | -4.333751635 | 1.500779585  | 3.629638261  |
| C | -3.153899330 | 1.739167903  | 4.549260374  |
| O | -3.256648251 | 2.486179156  | 5.537016635  |
| O | -2.000916896 | 1.171573227  | 4.304205348  |
| C | -3.144749138 | -4.642499932 | 2.590326707  |
| C | -3.940884261 | -3.348965279 | 2.757489049  |
| C | -3.204452352 | -2.144779340 | 2.185368638  |
| O | -3.168013734 | -1.998458660 | 0.944224638  |
| O | -2.684839791 | -1.351198679 | 3.057200201  |
| C | -1.932324684 | -1.391936778 | 6.519897702  |
| C | -0.592010400 | -1.562979924 | 5.899787853  |
| N | -0.191071618 | -1.064499052 | 4.666976631  |
| C | 0.472927212  | -2.240014720 | 6.441976868  |
| C | 1.072733525  | -1.438892826 | 4.495632861  |
| N | 1.502128501  | -2.143947593 | 5.545684374  |
| C | 8.594130654  | -8.831819820 | -1.869730129 |
| C | 7.391984098  | -7.943645118 | -1.920327684 |
| C | 6.709323007  | -7.472085408 | -0.824433911 |
| C | 6.746015463  | -7.361749096 | -3.063013867 |
| N | 5.678096274  | -6.656267602 | -1.212157483 |
| C | 5.668901606  | -6.563126028 | -2.577385457 |
| C | 6.959002987  | -7.422935059 | -4.453537997 |
| C | 4.816453027  | -5.852391763 | -3.426706544 |
| C | 6.117991825  | -6.711247260 | -5.299452419 |
| C | 5.055447646  | -5.935266388 | -4.792900378 |
| C | 1.956097749  | -5.176636200 | 2.488095040  |
| C | 3.318422000  | -5.657594181 | 1.997235403  |
| O | 3.946141932  | -6.480851227 | 2.720965191  |
| O | 3.756474249  | -5.191096669 | 0.890000425  |
| C | 6.479815514  | -3.617980621 | 6.952054259  |
| C | 5.345289774  | -3.859542584 | 5.985118166  |
| O | 4.328506094  | -3.139753570 | 5.967539553  |
| N | 5.503031445  | -4.907867912 | 5.162022954  |
| C | 3.991307246  | 1.999596752  | 8.128513162  |
| C | 2.566702309  | 2.383949607  | 7.887662887  |

|   |              |              |               |
|---|--------------|--------------|---------------|
| C | 1.827760377  | 2.052848728  | 6.776637833   |
| C | 1.682946813  | 3.148740776  | 8.727428173   |
| N | 0.556837581  | 2.558611313  | 6.868579866   |
| C | 0.429325357  | 3.234396411  | 8.052999850   |
| C | 1.812592960  | 3.777469845  | 9.980680564   |
| C | -0.669771936 | 3.910916944  | 8.590330525   |
| C | 0.722914503  | 4.453328647  | 10.515846410  |
| C | -0.506481175 | 4.518629189  | 9.828917080   |
| O | -4.517579891 | 1.559466057  | 8.532220110   |
| H | -1.194521115 | 3.760105233  | -2.143996688  |
| H | -0.039226754 | 3.112417377  | -3.303101541  |
| H | -1.792266531 | 2.991502734  | -3.646180906  |
| H | 3.950137051  | 2.405288919  | 1.080945026   |
| H | 2.865066518  | 3.766872275  | 0.770085806   |
| H | 4.212056063  | 3.951352053  | 1.909385017   |
| H | 2.115705560  | 3.685442752  | 3.210507550   |
| H | 3.159211013  | 2.312167620  | 3.475202283   |
| H | 3.683411640  | 0.132614183  | -2.925059722  |
| H | 1.927189012  | 0.292060817  | -3.053538862  |
| H | 2.795950108  | 1.180559869  | -1.796959307  |
| H | 4.220782486  | -2.382023005 | -1.984021247  |
| H | 1.179537771  | -2.623985906 | 0.904734058   |
| H | 3.168508435  | -3.782367723 | -0.039346934  |
| H | 2.198000000  | 0.259999000  | -9.844000000  |
| H | 1.009552108  | 1.486395064  | -10.284848984 |
| H | 2.254973898  | 1.862745906  | -9.086755549  |
| H | 0.511586164  | -1.432991626 | -9.165269488  |
| H | 0.652643427  | 2.414229900  | -7.248625950  |
| H | -0.973318575 | -2.270729969 | -7.374180357  |
| H | -0.838583622 | 1.585967728  | -5.481321459  |
| H | -1.896396859 | -0.259485676 | -4.621030151  |
| H | -6.335055291 | 0.693483015  | 3.605001349   |
| H | -5.235834816 | -0.181071605 | 4.684029428   |
| H | -5.881488348 | 1.403001539  | 5.165102918   |
| H | -4.650283084 | 2.490886360  | 3.274510707   |
| H | -4.019274833 | 0.926925702  | 2.756745401   |
| H | -2.189063656 | -4.598619653 | 3.127999856   |
| H | -3.716329216 | -5.488276243 | 2.991844197   |
| H | -2.933350495 | -4.847598322 | 1.534058961   |
| H | -4.158940008 | -3.173662988 | 3.816024228   |
| H | -4.894757229 | -3.433716601 | 2.220606308   |
| H | -1.981976618 | -1.982894795 | 7.438942124   |
| H | -2.123375829 | -0.346285199 | 6.779447083   |
| H | -2.732947128 | -1.722419874 | 5.853301877   |
| H | 0.575529065  | -2.772754587 | 7.378565349   |
| H | 1.686800536  | -1.212044610 | 3.638398044   |
| H | 2.431399934  | -2.544147498 | 5.647932362   |
| H | 9.467999000  | -8.258000000 | -1.545000000  |
| H | 8.463993391  | -9.649591571 | -1.150582106  |
| H | 8.822757178  | -9.275912710 | -2.843020054  |
| H | 6.884365947  | -7.668217647 | 0.226691972   |
| H | 5.028148860  | -6.210201497 | -0.575754780  |
| H | 7.773997765  | -8.017454370 | -4.866497926  |
| H | 3.990874721  | -5.260077902 | -3.032322061  |
| H | 6.278742389  | -6.754486244 | -6.376201352  |
| H | 4.408090069  | -5.393497364 | -5.481172749  |
| H | 1.606000000  | -5.719000000 | 3.376000000   |
| H | 2.024405184  | -4.114860471 | 2.747363906   |



|   |              |               |              |
|---|--------------|---------------|--------------|
| H | 1.212984607  | -5.268322759  | 1.688247931  |
| H | 6.513000000  | -4.432999000  | 7.686000000  |
| H | 7.447053871  | -3.604734092  | 6.436547087  |
| H | 6.325764625  | -2.670162339  | 7.470617564  |
| H | 6.330396164  | -5.482325564  | 5.210323155  |
| H | 4.789150139  | -5.176692309  | 4.497862156  |
| H | 4.382000000  | 1.434002000   | 7.274999000  |
| H | 4.635731623  | 2.877208202   | 8.272220966  |
| H | 4.101392235  | 1.374199533   | 9.024960225  |
| H | 2.123102472  | 1.482144891   | 5.907065772  |
| H | -0.169531319 | 2.425010069   | 6.179933315  |
| H | 2.754810727  | 3.736986929   | 10.527628700 |
| H | -1.617126769 | 3.961274792   | 8.055398103  |
| H | 0.816231005  | 4.940925667   | 11.485709991 |
| H | -1.345497034 | 5.051800897   | 10.274400745 |
| H | -4.160476486 | 1.837117542   | 7.676928348  |
| H | -5.396168320 | 1.964555261   | 8.543698003  |
| O | -4.531766607 | 5.331130038   | 5.375137487  |
| H | -4.140081384 | 4.442491803   | 5.392418941  |
| H | -4.054732255 | 5.762856954   | 4.652288928  |
| O | 8.834622796  | -5.228802981  | 2.075883361  |
| H | 9.203802051  | -4.633232875  | 2.742461609  |
| H | 8.034183928  | -4.750847699  | 1.778118260  |
| O | 4.649553697  | -8.796375879  | 1.434206968  |
| H | 4.433966311  | -7.949499889  | 1.895195656  |
| H | 4.385940241  | -8.627087267  | 0.521509027  |
| O | 6.527551328  | -3.808502907  | 1.051278880  |
| H | 6.367417951  | -2.968061514  | 1.500806712  |
| H | 5.678768089  | -4.277753087  | 1.124917552  |
| H | -1.466343153 | 1.973147783   | 1.758677775  |
| C | 2.7111035884 | -11.471749517 | 2.010125768  |
| H | 3.212024054  | -10.553800565 | 1.703107812  |
| H | 2.169019677  | -11.898356026 | 1.156326562  |
| H | 1.992012849  | -11.206471824 | 2.788773999  |
| N | 3.647364218  | -12.425735707 | 2.568159372  |
| H | 3.238089903  | -13.149811825 | 3.147935718  |
| C | 4.918202401  | -12.599816292 | 2.201543387  |
| N | 5.523824333  | -11.728054004 | 1.366715162  |
| H | 6.527978508  | -11.820170127 | 1.302267472  |
| H | 5.209705900  | -10.763419694 | 1.402469150  |
| N | 5.590170260  | -13.659762935 | 2.640318369  |
| H | 6.565014458  | -13.762779819 | 2.409587661  |
| H | 5.123276144  | -14.410931888 | 3.155014042  |
| O | 4.094670057  | -15.621645705 | 3.969659782  |
| S | 3.557409168  | -16.650968651 | 4.906388624  |
| O | 2.149255152  | -16.263394720 | 5.283256681  |
| O | 3.544384129  | -17.983815870 | 4.220800071  |
| O | 4.404248918  | -16.720166522 | 6.140500411  |
| H | 4.051683445  | -17.979016953 | 7.828805133  |
| O | 4.002081372  | -18.535977732 | 8.626139279  |
| H | 4.482635011  | -18.009803613 | 9.279981726  |
| H | 5.904837431  | -15.227942102 | 6.299243501  |
| O | 6.637849036  | -14.611665605 | 6.480986481  |
| H | 6.832834991  | -14.784343479 | 7.412381378  |
| H | 3.887138717  | -17.764209745 | 2.121360761  |
| O | 4.039142400  | -17.820522598 | 1.160756258  |
| H | 3.643111736  | -18.672461305 | 0.931295858  |
| H | 2.555080748  | -19.613729974 | 4.832577012  |

|   |              |               |             |
|---|--------------|---------------|-------------|
| O | 2.120506253  | -20.464689055 | 5.035973069 |
| H | 2.213029454  | -20.952271029 | 4.206121103 |
| H | 1.001806206  | -17.220463802 | 6.417794690 |
| O | 0.335409167  | -17.634819362 | 7.008093563 |
| H | -0.443794400 | -17.079185582 | 6.870461128 |
| H | 1.538871692  | -14.689852368 | 4.489877518 |
| O | 1.210605505  | -13.872267139 | 4.053021391 |
| H | 0.433643446  | -13.637397125 | 4.578433197 |

### Cartesian coordinates of Model-I-Asp237H-SO<sub>4</sub><sup>2-</sup>:

190

|    |              |              |              |
|----|--------------|--------------|--------------|
| Fe | 0.025035480  | 0.347185992  | 0.542207289  |
| Fe | -1.074834413 | -0.027023965 | 3.067683094  |
| O  | 0.070408873  | -0.857825740 | 2.057029930  |
| O  | -1.437249390 | 0.959891264  | 1.675939805  |
| O  | -1.124918734 | -1.089597023 | -0.509374002 |
| H  | -1.933094342 | -1.279781829 | 0.053634710  |
| H  | -1.430907149 | -0.567638609 | -1.311303292 |
| C  | -1.335780287 | 2.815660111  | -2.938677540 |
| C  | -1.161263859 | 1.545803125  | -2.132506237 |
| O  | -1.664568033 | 0.468838835  | -2.560391300 |
| O  | -0.482979139 | 1.662088606  | -1.054260754 |
| C  | 3.486910611  | 3.498242545  | 1.419536156  |
| C  | 2.680816683  | 3.048707001  | 2.625371018  |
| C  | 1.582450681  | 2.011856942  | 2.394761229  |
| O  | 1.404636188  | 1.646923809  | 1.166165648  |
| O  | 0.946577160  | 1.605358680  | 3.385905741  |
| C  | 2.895382137  | 0.682314426  | -2.322449260 |
| C  | 2.726868849  | -0.605386298 | -1.593596666 |
| N  | 1.795605351  | -0.813218380 | -0.589831867 |
| C  | 3.425606735  | -1.773404763 | -1.800336759 |
| C  | 1.939082518  | -2.072735635 | -0.212439278 |
| N  | 2.910672930  | -2.683311675 | -0.913145523 |
| C  | 1.358034254  | 0.949981260  | -9.716167497 |
| C  | 0.472116589  | 0.478423267  | -8.597717781 |
| C  | 0.060368386  | -0.859954205 | -8.521572103 |
| C  | 0.042986475  | 1.341098132  | -7.584691078 |
| C  | -0.732876564 | -1.324126797 | -7.477689159 |
| C  | -0.755738388 | 0.895398562  | -6.532865531 |
| C  | -1.140904127 | -0.445046436 | -6.469337936 |
| O  | -1.918064787 | -0.946433836 | -5.460509715 |
| C  | -5.380431650 | 1.239187596  | 4.107443219  |
| C  | -4.073683780 | 1.837863983  | 3.595081524  |
| C  | -2.962400126 | 1.864821592  | 4.630413996  |
| O  | -3.105599513 | 2.540082215  | 5.682948991  |
| O  | -1.873150786 | 1.210450444  | 4.424684157  |
| C  | -3.469207020 | -4.533828874 | 2.511692971  |
| C  | -4.171940599 | -3.180851076 | 2.613306712  |
| C  | -3.279513753 | -2.044468739 | 2.117325865  |
| O  | -3.219086374 | -1.853568386 | 0.873434552  |
| O  | -2.663519154 | -1.396392026 | 3.025390473  |
| C  | -2.226130428 | -1.340344645 | 6.456395684  |
| C  | -0.844318340 | -1.589232418 | 5.967727742  |

|   |              |              |               |
|---|--------------|--------------|---------------|
| N | -0.314352954 | -1.127849242 | 4.771791249   |
| C | 0.132077012  | -2.303325750 | 6.617836973   |
| C | 0.938814087  | -1.557653272 | 4.722559166   |
| N | 1.242144386  | -2.266417803 | 5.816824022   |
| C | 8.666596848  | -8.871498611 | -1.968738012  |
| C | 7.419486366  | -8.061644017 | -2.128687940  |
| C | 6.646682414  | -7.575154069 | -1.100564298  |
| C | 6.803229506  | -7.583077503 | -3.334873189  |
| N | 5.586775959  | -6.851668126 | -1.587785681  |
| C | 5.647567907  | -6.839537351 | -2.955909378  |
| C | 7.121343450  | -7.676448346 | -4.704068454  |
| C | 4.807602447  | -6.224901198 | -3.890328384  |
| C | 6.300899285  | -7.049992692 | -5.631859605  |
| C | 5.151876635  | -6.338400981 | -5.231143578  |
| C | 1.952972971  | -5.230964002 | 2.460975015   |
| C | 3.053598240  | -6.024750830 | 1.823914169   |
| O | 3.267890297  | -7.168980675 | 2.474088862   |
| O | 3.684508730  | -5.674783783 | 0.827781926   |
| C | 6.390044243  | -3.623616015 | 6.952691906   |
| C | 5.107309193  | -3.865306014 | 6.204537426   |
| O | 4.037366768  | -3.325719770 | 6.532742452   |
| N | 5.188704469  | -4.711136505 | 5.154925883   |
| C | 4.053193171  | 2.023565934  | 8.136857700   |
| C | 2.626964282  | 2.438995962  | 7.971090525   |
| C | 1.814366758  | 2.140143877  | 6.901125033   |
| C | 1.814482359  | 3.207986482  | 8.875735248   |
| N | 0.562399147  | 2.669279570  | 7.084154484   |
| C | 0.522812178  | 3.328185506  | 8.284582181   |
| C | 2.036916334  | 3.807472657  | 10.130552681  |
| C | -0.524764121 | 4.016698386  | 8.903727512   |
| C | 0.996160287  | 4.489929986  | 10.749514460  |
| C | -0.272073469 | 4.593564052  | 10.142478517  |
| O | -4.390255889 | 1.350369968  | 8.347602695   |
| H | -1.529049678 | 3.663702881  | -2.274012557  |
| H | -0.400655841 | 3.029684515  | -3.472161376  |
| H | -2.144702238 | 2.719571312  | -3.667130708  |
| H | 4.026991143  | 2.663012529  | 0.959594470   |
| H | 2.847584796  | 3.941294871  | 0.647532878   |
| H | 4.226164601  | 4.252083498  | 1.719801243   |
| H | 2.187340309  | 3.907300967  | 3.102197732   |
| H | 3.339229306  | 2.631419267  | 3.399554513   |
| H | 3.784856525  | 0.639597270  | -2.958665996  |
| H | 2.033123123  | 0.891395030  | -2.965373945  |
| H | 2.998095154  | 1.523974959  | -1.631875785  |
| H | 4.222693038  | -2.025156219 | -2.487870090  |
| H | 1.352027651  | -2.570389784 | 0.545355167   |
| H | 3.185387916  | -3.648414395 | -0.793084984  |
| H | 2.198000000  | 0.259998000  | -9.844000000  |
| H | 0.820645117  | 0.989705963  | -10.673423478 |
| H | 1.761946987  | 1.947976885  | -9.517563059  |
| H | 0.377172366  | -1.565854367 | -9.290951457  |
| H | 0.343498389  | 2.389423449  | -7.603527966  |
| H | -1.033257053 | -2.370195313 | -7.429219757  |
| H | -1.073657494 | 1.591592218  | -5.759387116  |
| H | -1.938551699 | -0.309032122 | -4.726727116  |
| H | -6.138267713 | 1.263151671  | 3.314445379   |
| H | -5.247709615 | 0.193465404  | 4.410279686   |
| H | -5.774483390 | 1.795410197  | 4.964738853   |

|   |              |               |              |
|---|--------------|---------------|--------------|
| H | -4.245024901 | 2.880938470   | 3.294427405  |
| H | -3.730441049 | 1.299941968   | 2.709592992  |
| H | -2.555697986 | -4.553258802  | 3.119688798  |
| H | -4.128094767 | -5.335875252  | 2.867696218  |
| H | -3.191123564 | -4.760913456  | 1.474901570  |
| H | -4.461041263 | -2.987308316  | 3.652191140  |
| H | -5.081532318 | -3.192055360  | 1.999172556  |
| H | -2.394359197 | -1.900055291  | 7.381414319  |
| H | -2.382126764 | -0.278597140  | 6.664196998  |
| H | -2.973839295 | -1.644488238  | 5.719395298  |
| H | 0.125710978  | -2.822916231  | 7.567344816  |
| H | 1.632291827  | -1.369549196  | 3.917011981  |
| H | 2.142231847  | -2.690368449  | 6.015611527  |
| H | 9.468000000  | -8.257999000  | -1.544998000 |
| H | 8.517835753  | -9.716476862  | -1.285468109 |
| H | 9.019362461  | -9.273417256  | -2.922217771 |
| H | 6.818864709  | -7.646992845  | -0.033150261 |
| H | 4.848236468  | -6.464507992  | -1.016809011 |
| H | 8.008489002  | -8.217083309  | -5.033767778 |
| H | 3.922035044  | -5.671228159  | -3.577999539 |
| H | 6.551821300  | -7.103454319  | -6.690604077 |
| H | 4.526835960  | -5.859981096  | -5.983757719 |
| H | 1.605999000  | -5.719000000  | 3.376000000  |
| H | 2.296994225  | -4.212844952  | 2.666908276  |
| H | 1.121209440  | -5.161345609  | 1.750562061  |
| H | 6.512998000  | -4.433001000  | 7.686002000  |
| H | 7.263901780  | -3.632675328  | 6.293049561  |
| H | 6.330745512  | -2.671773209  | 7.484115592  |
| H | 6.024375262  | -5.257385665  | 5.007286602  |
| H | 4.330549651  | -5.070088866  | 4.764156219  |
| H | 4.381999000  | 1.433999000   | 7.275002000  |
| H | 4.726583815  | 2.886263210   | 8.229885875  |
| H | 4.197618023  | 1.409418683   | 9.036161959  |
| H | 2.034097931  | 1.586828522   | 5.996268358  |
| H | -0.210295521 | 2.553551816   | 6.442730885  |
| H | 3.010961917  | 3.736524800   | 10.615474258 |
| H | -1.502112009 | 4.100375216   | 8.429375698  |
| H | 1.160344495  | 4.952492454   | 11.722328981 |
| H | -1.069353676 | 5.135152700   | 10.650116902 |
| H | -3.972166032 | 1.701464187   | 7.545126233  |
| H | -5.030637524 | 2.037858928   | 8.579097175  |
| O | 6.804618677  | -4.144391057  | 1.050901460  |
| H | 6.781331458  | -3.232985307  | 1.375277155  |
| H | 5.878994867  | -4.416650220  | 1.087148585  |
| O | -4.865326302 | 4.699459130   | 6.179002608  |
| H | -4.271017865 | 3.956612535   | 5.929120942  |
| H | -4.475559304 | 5.457686854   | 5.722445029  |
| H | 3.935750554  | -7.731718224  | 1.994535173  |
| O | 8.815361806  | -5.919809638  | 2.532674322  |
| H | 9.610201936  | -5.373611165  | 2.613324803  |
| H | 8.192327618  | -5.324137297  | 2.084439083  |
| O | 4.897444614  | -9.060050012  | 1.459520799  |
| H | 5.111228562  | -8.971353146  | 0.520199158  |
| H | 5.755446282  | -9.032886750  | 1.905895928  |
| C | 2.611555035  | -11.886260919 | 2.356736175  |
| H | 2.902112910  | -10.876986305 | 2.669703523  |
| H | 2.522539417  | -11.917019756 | 1.265173715  |
| H | 1.633343377  | -12.104219140 | 2.785931274  |

|   |             |               |             |
|---|-------------|---------------|-------------|
| N | 3.540955925 | -12.888176035 | 2.833382345 |
| H | 3.221022362 | -13.510686933 | 3.566469348 |
| C | 4.772607326 | -13.063278469 | 2.357458867 |
| N | 5.222918791 | -12.262343994 | 1.368745409 |
| H | 6.208513254 | -12.328957913 | 1.157386009 |
| H | 4.857714034 | -11.319333198 | 1.335306801 |
| N | 5.549417374 | -14.035526833 | 2.826317742 |
| H | 6.450868603 | -14.181555026 | 2.399565124 |
| H | 5.157633665 | -14.805018618 | 3.382285394 |
| O | 4.348153429 | -16.026467428 | 4.345944173 |
| S | 4.095255955 | -17.305069532 | 5.077272794 |
| O | 2.739741009 | -17.221931115 | 5.717476798 |
| O | 4.135798078 | -18.456781921 | 4.116130084 |
| O | 5.144538907 | -17.495426188 | 6.132482259 |
| H | 1.863430232 | -18.623913036 | 6.922437129 |
| H | 2.030848924 | -15.369820593 | 5.104962082 |
| O | 1.347182845 | -19.193728253 | 7.522251696 |
| H | 0.522056793 | -18.698740042 | 7.619872276 |
| O | 1.621593465 | -14.521562973 | 4.845310047 |
| H | 0.832273175 | -14.479982834 | 5.403103814 |
| H | 3.711944623 | -20.426392499 | 4.646310482 |
| H | 4.214079090 | -17.992512448 | 2.125352303 |
| O | 3.525156969 | -21.371640562 | 4.795809068 |
| H | 3.290132924 | -21.680344872 | 3.913749649 |
| O | 4.275535292 | -17.868658295 | 1.158420482 |
| H | 4.033792813 | -18.739632466 | 0.814256700 |
| H | 5.237512073 | -19.062771385 | 7.421924102 |
| H | 6.546286813 | -15.999323645 | 6.404142202 |
| O | 7.266416677 | -15.364596727 | 6.576188077 |
| H | 7.477896100 | -15.528057259 | 7.505730046 |
| O | 5.423686645 | -19.778398753 | 8.058430056 |
| H | 5.728236549 | -19.294165918 | 8.838230890 |

### Cartesian coordinates of Model-II-Asp237H-SO<sub>4</sub><sup>2-</sup>:

191

|    |              |              |              |
|----|--------------|--------------|--------------|
| Fe | 0.042262910  | 0.223804508  | 0.354114239  |
| Fe | -1.144884465 | -0.038288121 | 3.051271610  |
| O  | -0.168586828 | -0.880143956 | 1.929892550  |
| O  | -1.588663868 | 1.045617549  | 1.490161459  |
| O  | -1.277906730 | -1.047566571 | -0.634603729 |
| H  | -2.031912498 | -1.301779572 | -0.028636766 |
| H  | -1.631424680 | -0.472891289 | -1.382903229 |
| C  | -1.113829164 | 2.937660499  | -2.851711362 |
| C  | -1.089840907 | 1.612811750  | -2.131343405 |
| O  | -1.802119555 | 0.655463930  | -2.527570970 |
| O  | -0.290549869 | 1.560586087  | -1.122777100 |
| C  | 3.460027382  | 3.235433628  | 1.587823809  |
| C  | 2.580920952  | 2.773050677  | 2.735923314  |
| C  | 1.422959795  | 1.851600308  | 2.389017827  |
| O  | 1.330007263  | 1.487077439  | 1.157610175  |
| O  | 0.638445365  | 1.515395926  | 3.305946073  |
| C  | 2.772140149  | 0.422561228  | -2.334581701 |
| C  | 2.617210843  | -0.810365862 | -1.517516178 |

|   |              |              |              |
|---|--------------|--------------|--------------|
| N | 1.661941734  | -0.982459568 | -0.527422001 |
| C | 3.345904739  | -1.972215019 | -1.614791446 |
| C | 1.822059740  | -2.212900087 | -0.058306252 |
| N | 2.825617412  | -2.835665165 | -0.686993317 |
| C | 1.567453167  | 1.061472922  | -9.453445022 |
| C | 0.672846943  | 0.547776107  | -8.360701988 |
| C | 0.221789570  | -0.779636777 | -8.350324766 |
| C | 0.245283856  | 1.378321418  | -7.318602949 |
| C | -0.613624054 | -1.264967172 | -7.348654375 |
| C | -0.592893588 | 0.912589022  | -6.310578981 |
| C | -1.025021833 | -0.416633589 | -6.316819634 |
| O | -1.845397966 | -0.930983751 | -5.350568548 |
| C | -5.482974728 | 0.908268392  | 4.378795164  |
| C | -4.304393750 | 1.561210425  | 3.661018322  |
| C | -3.102502740 | 1.776176944  | 4.556229898  |
| O | -3.164161221 | 2.529947698  | 5.542193734  |
| O | -1.970183793 | 1.175483907  | 4.295793350  |
| C | -3.229159180 | -4.627861729 | 2.588545233  |
| C | -3.983948233 | -3.309852480 | 2.754349901  |
| C | -3.215033515 | -2.132379884 | 2.170781661  |
| O | -3.157273978 | -2.013419865 | 0.926715892  |
| O | -2.692565881 | -1.333255474 | 3.034460071  |
| C | -1.978220678 | -1.342374558 | 6.524753976  |
| C | -0.642006558 | -1.556884577 | 5.909144117  |
| N | -0.223251586 | -1.094276182 | 4.668178376  |
| C | 0.403746893  | -2.247592003 | 6.470370947  |
| C | 1.032046056  | -1.501474465 | 4.510757560  |
| N | 1.438676790  | -2.195432469 | 5.577376373  |
| C | 8.645178607  | -8.845071688 | -1.956931343 |
| C | 7.425945268  | -7.985178642 | -2.023000941 |
| C | 6.759352073  | -7.479490695 | -0.932503046 |
| C | 6.762620580  | -7.437600550 | -3.172066926 |
| N | 5.711417765  | -6.686560441 | -1.329468035 |
| C | 5.679762677  | -6.643153663 | -2.696212731 |
| C | 6.995571219  | -7.492120306 | -4.560060484 |
| C | 4.818913283  | -5.951470133 | -3.553126991 |
| C | 6.160279527  | -6.782334824 | -5.411254579 |
| C | 5.077309636  | -6.027384197 | -4.914463470 |
| C | 1.963104134  | -5.183017444 | 2.494326096  |
| C | 3.089652831  | -5.925486728 | 1.841795565  |
| O | 3.305146809  | -7.097634148 | 2.426040690  |
| O | 3.740905337  | -5.498647905 | 0.885854620  |
| C | 6.451443388  | -3.647252180 | 6.921934234  |
| C | 5.208486215  | -3.893617167 | 6.109976636  |
| O | 4.172763255  | -3.222664876 | 6.264979435  |
| N | 5.285782038  | -4.898907289 | 5.216720327  |
| C | 3.998752445  | 1.979200606  | 8.144276719  |
| C | 2.570075745  | 2.362488584  | 7.928160931  |
| C | 1.804299219  | 2.023299034  | 6.837696524  |
| C | 1.707455899  | 3.133594508  | 8.783974880  |
| N | 0.535631885  | 2.529630416  | 6.958445963  |
| C | 0.437884101  | 3.215731678  | 8.139837329  |
| C | 1.867237589  | 3.762953916  | 10.033432117 |
| C | -0.646557618 | 3.896910631  | 8.700188355  |
| C | 0.790228984  | 4.439221698  | 10.593701230 |
| C | -0.453518535 | 4.506888591  | 9.933451897  |
| O | -4.419955661 | 1.707583232  | 8.733124174  |
| H | -1.291081070 | 3.741388530  | -2.128580676 |

|   |              |              |               |
|---|--------------|--------------|---------------|
| H | -0.130664760 | 3.125738685  | -3.300055373  |
| H | -1.882989286 | 2.959996872  | -3.626259099  |
| H | 3.956587767  | 2.393619889  | 1.093083725   |
| H | 2.882593973  | 3.774109731  | 0.828088415   |
| H | 4.236736381  | 3.912095128  | 1.964790861   |
| H | 2.142128355  | 3.629348675  | 3.265584756   |
| H | 3.177561945  | 2.243285618  | 3.491564485   |
| H | 3.692339382  | 0.364222277  | -2.922546106  |
| H | 1.937134580  | 0.541080809  | -3.034484638  |
| H | 2.810470251  | 1.320345925  | -1.710328536  |
| H | 4.171371251  | -2.244407282 | -2.260451384  |
| H | 1.222334050  | -2.674876462 | 0.710072107   |
| H | 3.130369796  | -3.777745004 | -0.473267126  |
| H | 2.198002000  | 0.259998000  | -9.844000000  |
| H | 0.985059773  | 1.459339966  | -10.296450470 |
| H | 2.216568612  | 1.868683631  | -9.096640067  |
| H | 0.537511560  | -1.460675798 | -9.141945536  |
| H | 0.576717735  | 2.417192690  | -7.284299592  |
| H | -0.945541113 | -2.302639066 | -7.352505144  |
| H | -0.913905738 | 1.584798929  | -5.518590804  |
| H | -1.928376100 | -0.282421755 | -4.632531806  |
| H | -6.324272965 | 0.801168229  | 3.683519612   |
| H | -5.223433596 | -0.091803896 | 4.745965883   |
| H | -5.821516870 | 1.510210328  | 5.228945205   |
| H | -4.604052176 | 2.555592590  | 3.303302632   |
| H | -4.019600419 | 0.972493843  | 2.787662345   |
| H | -2.270235570 | -4.610746946 | 3.122360544   |
| H | -3.823942419 | -5.454688205 | 2.995658818   |
| H | -3.028793764 | -4.842610930 | 1.532174739   |
| H | -4.190294436 | -3.121760823 | 3.812897562   |
| H | -4.943278056 | -3.367568155 | 2.223536121   |
| H | -2.042464546 | -1.919449151 | 7.451708156   |
| H | -2.141849027 | -0.289003358 | 6.770818428   |
| H | -2.787617746 | -1.660896136 | 5.863304819   |
| H | 0.488720777  | -2.762841869 | 7.418525188   |
| H | 1.657477505  | -1.300559436 | 3.654856747   |
| H | 2.361178695  | -2.603630022 | 5.707856585   |
| H | 9.467999000  | -8.258000000 | -1.544998000  |
| H | 8.503655912  | -9.708996337 | -1.296534388  |
| H | 8.947152492  | -9.218691213 | -2.938695898  |
| H | 7.016220871  | -7.574453106 | 0.116185295   |
| H | 5.031012137  | -6.278126308 | -0.704155141  |
| H | 7.828829799  | -8.067543387 | -4.962760895  |
| H | 3.983309685  | -5.368304220 | -3.166502564  |
| H | 6.344460994  | -6.804365990 | -6.484618344  |
| H | 4.435486221  | -5.487098365 | -5.608606482  |
| H | 1.605999000  | -5.719000000 | 3.376000000   |
| H | 2.289327098  | -4.174392308 | 2.763348679   |
| H | 1.142705537  | -5.092318178 | 1.773813521   |
| H | 6.513000000  | -4.432999000 | 7.686001000   |
| H | 7.358951478  | -3.702784091 | 6.310945292   |
| H | 6.387534715  | -2.673141900 | 7.409776801   |
| H | 6.092355931  | -5.504770073 | 5.194275306   |
| H | 4.439421686  | -5.234868848 | 4.783969068   |
| H | 4.382000000  | 1.434002000  | 7.275000000   |
| H | 4.640317803  | 2.856785751  | 8.299057957   |
| H | 4.122156633  | 1.335902817  | 9.026273051   |
| H | 2.076695555  | 1.447559257  | 5.963665740   |

|   |              |               |              |
|---|--------------|---------------|--------------|
| H | -0.203508222 | 2.407599458   | 6.280885146  |
| H | 2.821361646  | 3.720287471   | 10.559108135 |
| H | -1.606015595 | 3.949429347   | 8.187302801  |
| H | 0.905674390  | 4.926879766   | 11.561114938 |
| H | -1.280658125 | 5.043443388   | 10.396601690 |
| H | -4.108176570 | 1.978517766   | 7.858878234  |
| H | -5.331491146 | 2.032331436   | 8.750528781  |
| H | -1.453168055 | 1.973203491   | 1.741431558  |
| O | -4.470909507 | 5.337342047   | 5.552509201  |
| H | -4.068008971 | 4.454923440   | 5.504684287  |
| H | -3.993606307 | 5.830802109   | 4.870408128  |
| H | 4.000960302  | -7.636738272  | 1.943998704  |
| O | 6.741913229  | -3.662561620  | 0.976364825  |
| H | 6.710198328  | -2.766985470  | 1.341292651  |
| H | 5.853433383  | -4.002714714  | 1.140858222  |
| O | 8.915669663  | -5.538669350  | 2.183457276  |
| H | 9.484107245  | -4.966501713  | 2.718186117  |
| H | 8.264325541  | -4.913094076  | 1.826491556  |
| O | 4.965898704  | -8.894888267  | 1.420717900  |
| H | 5.228734564  | -8.777926502  | 0.495680241  |
| H | 5.801488196  | -8.874867968  | 1.908195984  |
| C | 2.623942196  | -11.841187659 | 2.296774960  |
| H | 2.933359319  | -10.831357443 | 2.591065164  |
| H | 2.532029830  | -11.891051301 | 1.206034515  |
| H | 1.642638989  | -12.032590310 | 2.731543039  |
| N | 3.534256259  | -12.850379623 | 2.792839757  |
| H | 3.193480632  | -13.471133665 | 3.517543714  |
| C | 4.773293220  | -13.039473953 | 2.341308209  |
| N | 5.253358539  | -12.245398306 | 1.363555990  |
| H | 6.242688380  | -12.310025681 | 1.172306788  |
| H | 4.872043478  | -11.313853702 | 1.287039464  |
| N | 5.530263320  | -14.019057588 | 2.826661670  |
| H | 6.439363805  | -14.176600146 | 2.420774935  |
| H | 5.122849457  | -14.777494453 | 3.383327417  |
| O | 4.302485181  | -16.014337292 | 4.345566679  |
| S | 4.030757636  | -17.275859432 | 5.102011685  |
| O | 2.672860949  | -17.154702252 | 5.736364056  |
| O | 4.049734852  | -18.442654908 | 4.160550362  |
| O | 5.076821186  | -17.462070733 | 6.161653334  |
| H | 1.899224006  | -18.476418066 | 7.013937858  |
| H | 1.986787976  | -15.275718782 | 5.092343341  |
| O | 1.421499549  | -19.043631600 | 7.651939438  |
| H | 0.523269047  | -18.687040332 | 7.617192232  |
| O | 1.571801552  | -14.432053819 | 4.828859858  |
| H | 0.785927211  | -14.390689074 | 5.391347217  |
| H | 3.878824766  | -20.532082248 | 4.626303818  |
| H | 4.202355003  | -17.927751883 | 2.126867297  |
| O | 3.848792681  | -21.502190920 | 4.703246936  |
| H | 3.272399573  | -21.753725027 | 3.968361925  |
| O | 4.273067355  | -17.805358702 | 1.162486938  |
| H | 4.056418507  | -18.682153903 | 0.817116816  |
| H | 5.315662999  | -19.123268525 | 7.377376076  |
| H | 6.574570954  | -15.975359027 | 6.393831961  |
| O | 7.321971561  | -15.371425478 | 6.555153320  |
| H | 7.523983422  | -15.528732363 | 7.488089468  |
| O | 5.557143462  | -19.844572384 | 7.987110387  |
| H | 5.711792678  | -19.374538439 | 8.818045240  |
